# Supplementary material for: Genome sizes and chromosomal repatterning in the evolution of Saxifraga and other Saxifragaceae
Source: Research Square preprint supplement (doi:10.21203/rs.3.rs-8115725/v1), 2025-11-25
Supplement: Supplementary file 1 [file 1168111cb87c2cbe6c5447fe.docx]

**Table 1** Updated classification of *Saxifraga* species sampled for genome size estimates, providing a summary of taxon selection and sampling density. The linear sequence of sections and subsections in *Saxifraga* is phylogenetically arranged (Haston et al. 2007)

| **Taxon** | | | **Species number in**  **total** | **Number of species sampled for FCM** |
| --- | --- | --- | --- | --- |
| *Saxifraga* Tourn. ex L. | | | 483 | 122 |
|  | 1. sect. *Heterisia* (Raf. ex Small) A.M.Johnson | | 1 | — |
|  | 2. sect. *Irregulares* Haw. | | 17 | 4 |
|  | 3. sect. *Saxifragella* (Engl.) Gornall & Z.X.Zhang | | 1 | — |
|  | 4. sect. *Pseudocymbalaria* Zhmylev | | 4 | — |
|  | 5. sect. *Bronchiales* DeChaine | | 14 | 5 |
|  | 6. sect. *Ciliatae* Haw. | | 214 | 16 |
|  |  | 6a. Clade 11 | 46 | 5 |
|  |  | 6b. Clade 22 | 57 | 5 |
|  |  | 6c. subsect. *Hirculoideae* (Engl. & Irmsch.) Gornall (Clade 3)3 | 111 | 6 |
|  | 7. sect. *Cymbalaria* Griseb. | | 5 | 2 |
|  | 8. sect. *Odontophyllae* Gornall4 | | 1 | — |
|  | 9. sect. *Mesogyne* Sternb. | | 11 | 1 |
|  | 10. sect. *Saxifraga* L. | | 88 | 27 |
|  |  | 10a. subsect. *Irriguae* (Engl. & Irmsch.) Tkach, Spielau, D.Horák & Röser | 1 | 1 |
|  |  | 10b. subsect. *Androsaceae* (Engl. & Irmsch.) Tkach, Röser & M.H.Hoffm. | 7 | 1 |
|  |  | 10c. subsect. *Tridactylites* (Haw.) Gornall | 4 | 1 |
|  |  | 10d. subsect. *Arachnoideae* (Engl. & Irmsch.) Tkach, Röser & M.H.Hoffm. | 12 | 6 |
|  |  | 10e. *Saxifraga* | 64 | 18 |
|  | 11. sect. *Cotylea* Tausch | | 5 | 1 |
|  | 12. sect. *Gymnopera* D.Don | | 4 | 3 |
|  | 13. sect. *Ligulatae* Haw. | | 14 | 12 |
|  | 14. sect. *Trachyphyllum* (Gaudin) W.D.J.Koch | | 2 | 2 |
|  | 15. sect. *Porphyrion* Tausch | | 102 | 49 |
|  |  | 15a. subsect. *Florulentae* (Engl. & Irmsch.) Gornall | 1 | — |
|  |  | 15b. subsect. *Kabschia* (Engl.) Rouy & Camus | 93 | 43 |
|  |  | 15c. subsect. *Oppositifoliae* Hayek | 4 | 2 |
|  |  | 15d. subsect. *Mutatae* (Engl. & Irmsch.) Gornall | 2 | 2 |
|  |  | 15e. subsect. *Squarrosae* (Engl. & Irmsch.) Tkach, Röser & M.H.Hoffm. | 2 | 2 |

1 This clade, as revealed by molecular phylogenetic analyses (Gao et al. 2015; Tkach et al. 2015a; Ebersbach et al. 2017a; Moerland 2023), encompasses species belonging to the following subsections: *Cinerascentes* Engl. & Irmsch., *Flagellares* (C.B.Clarke) Engl. & Irmsch., *Gemmiparae* Engl. & Irmsch. and *Hemisphaericae* (Engl. & Irmsch.) Gornall as circumscribed by Gornall (1987). No morphological synapomorphies are known for this clade (Gao et al. 2015)

2 This clade (Gao et al. 2015; Tkach et al. 2015a; Ebersbach et al. 2017a; Moerland 2023) includes species from the subsections *Rosulares* Gornall and *Serpyllifoliae* Gornall as circumscribed by Gornall (1987). No morphological synapomorphies are known for this clade (Gao et al. 2015)

3 This clade (Gao et al. 2015; Tkach et al. 2015a; Ebersbach et al. 2017a; Moerland 2023) corresponds to the subsection *Hirculoideae* Engl. & Irmsch. as circumscribed by Gornall (1987). This subsection is characterized by morphological synapomorphies (Gao et al. 2015: p. 709)

4 This section only includes *S. odontophylla*, which sister species to the entire sect. *Mesogyne*, as revealed by nuclear DNA analysis. *Saxifraga odontophylla* is also characterized by a long branch in the phylograms (Carruthers et al. 2024). Therefore, *S. odontophylla* should not be considered conspecific with *S. sibirica* (sect. *Mesogyne*), as previously suggested (Akiyama and Gornall 2012). Supported by its uniquely structured seed coat (Kaplan 1981; Tkach et al. 2015a: p. 1180), recognizing *S. odontophylla* as a distinct, monospecific section seems justified (Moerland 2023). However, plastid DNA data for *S. odontophylla* are not yet available
