# Supplementary material for: Genome sizes and chromosomal repatterning in the evolution of Saxifraga and other Saxifragaceae
Source: Research Square preprint supplement (doi:10.21203/rs.3.rs-8115725/v1), 2025-11-25
Supplement: Supplementary file 2 [file 2127288684a8bfde773e43a8.docx]

**Table 6** Pathways of speciation in *Saxifraga* supported by molecular or cytogenetic data. Cases of (A) hybridization and allopolyploidy, (B) autopolyploidy and proposed (C) homoploid hybrid speciation

| **Process and taxon** | | | **Parental species** | **References** |
| --- | --- | --- | --- | --- |
|  |  | |  |  |
| **(A) Hybridization and allopolyploidy:** | | | | |
|  | **sect. *Mesogyne*** | | | |
|  |  | *S. opdalensis* Blytt (2*n* = 4*x* =48–50) | *S. rivularis* L. (2*n* = 4*x* = 52) × *S. cernua* L. (2*n* = 2*x*–12*x* = 24–72) | Steen et al. (2000) |
|  |  | *S. svalbardensis* Øvstedal (2*n* = 5*x* = ca. 64) | *S. rivularis* L. (2*n* = 4*x* = 52) × *S.* *cernua* L. (2*n* = 2*x*–12*x* = 24–72) | Brochmann et al. (1998) |
|  |  | *S. rivularis* L. (2*n* = 4*x* = 52) | *S. bracteata* D.Don (2*n* = 2*x* = 26) × *S. hyperborea* R.Br. (2*n* = 2*x* = 26 | Jørgensen et al. (2006) |
|  | **sect. *Saxifraga*** | | | |
|  |  | S. *osloensis* Knaben (2*n* = 4*x* = 44) | *S. adscendens* L. (2*n* = 2*x* = 22) × *S. tridactylites* L. (2*n* = 2*x* = 22) | Brochmann et al. (1996); Tkach et al. (2015a, 2019) |
|  |  | *S. wahlenbergii* Ball (2*n* = 6*x* = 66) | *S. adscendens* L. or related species from subsect. *Tridactylites* (2*n* = 2*x* = 22 or 2*n* = 4*x* = 44) × *S. androsacea* L. or related species from subsect. *Androsaceae* (2*n* = 2*x* = 22 or 2*n* = 4*x* = 44) | Tkach et al. (2015a, 2019) |
|  | **sect. *Porphyrion*** | | | |
|  |  | S. *nathorstii* (Dusén) Hayek (2*n* = 4*x* = 52) | *S. aizoides* L. (2*n* = 2*x* = 26) × *S. oppositifolia* L. (2*n* = 2*x* = 26) | Böcher (1983) |
|  |  |  |  |  |
| **(B) Autopolyploidy:** | | | | |
|  | **sect. *Porphyrion*** | | | |
|  |  | *S. maderensis* D.Don (2*n* = 8*x* = 100–124) | ancestor with 4*x* | Mas de Xaxars et al. (2015) |
|  |  | *S. portosanctana* Boiss. (2*n* = 4*x* = 54–60) | ancestor with 2*x* | Mas de Xaxars et al. (2015) |
|  |  |  |  |  |
| **Uncertain whether (A) allo- or (B) autopolyploidy:** | | | | |
|  | **sect. *Mesogyne*** | | | |
|  |  | *S. cernua* L. (2*n* = 2*x*–12*x* = 24–72) | (A) *S*. *sibirica* L. (2*n* = 2*x*–4*x* = 16–52) or  (B) *S. rivularis* L. (2*n* = 4*x* = 52) × *S. sibirica* L. (2*n* = 2*x*–4*x* = 16–52) × *S. radiata* Small (2*n* = 2*x*–4*x* = 20–48) | Kapralov et al. (2006); Elven et al. (2020) |
|  |  |  |  |  |
| **(C) Proposed homoploid hybrid speciation:** | | | | |
|  | **sect. *Saxifraga*** | | | |
|  |  | *S. intricata* Lapeyr. (2*n* = 2*x* = 32, 34) | ancestor or relative of *S. fragilis* (2*n* = 2*x*[?] = 60–66) × unknown Pyrenean taxon (2*x*) | Mas de Xaxars et al. (2015) |
|  |  | *S. pubescens* Pourr. (2*n* = 2*x* = 26, 28) | ancestor or relative of *S. fragilis* (2*n* = 2*x*[?] = 60–66) × unknown Pyrenean taxon (2*x*) | Mas de Xaxars et al. (2015), but hybrid origin now refuted (Carnicero et al. 2023) |
