# Supplementary material for: Genome sizes and chromosomal repatterning in the evolution of Saxifraga and other Saxifragaceae
Source: Research Square preprint supplement (doi:10.21203/rs.3.rs-8115725/v1), 2025-11-25
Supplement: Supplementary file 3 [file 263c0d18c52911e61ebe3e48.docx]

**Table 4** Genome parameters of *Saxifraga* and other Saxifragaceae genera, including a summary of genome sizes (holoploid 2C and monoploid 1Cx values), mean chromosome DNA content (MC) and probable chromosome base numbers of the studied taxa. The 1Cx values and MCs in square brackets indicate estimated data based on the 2C values and available chromosome counts for related species of the same section or subsection (Table 2 and Online Resource 1). To represent the total range of currently known 2C genome sizes, 2C values estimated in previous studies (Table 3) are provided in parentheses. Sections and subsections according to Table 1 and Tkach et al. (2015b). *N/A* not available

| **Taxon** | | | **2C value [pg]** | **1Cx value [pg]** | **MC [pg]** |
| --- | --- | --- | --- | --- | --- |
| ***Saxifraga*** | | | 0.87–14.87 | [0.14]–2.11 | 0.01–[≤0.26] |
|  | sect. *Irregulares* (*x* = 8, 9, 10, 11) | | 1.83–12.36 | 0.92 and N/A | 0.08 and N/A |
|  | sect. *Bronchiales* (*x* = 13) | | 2.24–7.56 | [0.95]–1.32 | [0.07]–0.10 |
|  | sect. *Ciliatae* (*x* = 8) | | (1.88–)2.63–14.87 | [1.15]–[≤2.10] | [0.15]–[≤0.26] |
|  |  | Clade 1 (*x* = 8) | (2.03–)2.63–12.61 | [1.15]–[≤2.10] | [0.15]–[≤0.26] |
|  |  | Clade 2 (*x* = 8) | (2.70–)3.74–9.82 | [1.47]–[2.01] | [0.18]–[0.25] |
|  |  | subsect. *Hirculoideae* (Clade 3) (*x* = 8) | (1.88–)3.53–14.87 | [1.39]–[1.96] | [0.17]–[0.24] |
|  | sect. *Cymbalaria* (*x* = 9) | | 1.42–1.93 | 0.71–0.97 | 0.08–0.11 |
|  | sect. *Mesogyne* (*x* = 13 ?) | | (0.94–)0.99–1.04(–2.04) | 0.50–0.52 | 0.04 |
|  | sect. *Saxifraga* (*x* = 11, 13) | | 0.87–5.90(–7.52) | [0.14]–0.68 | 0.01–0.06 |
|  |  | subsect. *Irriguae* (*x* = 11) | 2.40 | 0.60 | 0.05 |
|  |  | subsect. *Androsaceae* (*x* = 11) | 1.46–1.56 | N/A | N/A |
|  |  | subsect. *Tridactylites* (*x* = 11) | (1.15–)1.36 | 0.68 | 0.06 |
|  |  | subsect. *Arachnoideae* (*x* = 11) | 0.87–1.01(–3.35) | [0.14]–0.17 | 0.01–0.02 |
|  |  | subsect. *Saxifraga* (*x* = 11, 13) | (1.15–)1.27–5.90(–7.52) | [0.21]–0.63 and N/A | [0.02]–0.05 and N/A |
|  | sect. *Cotylea* (*x* = 11) | | (3.28–)3.36–4.62 | [1.54]–1.84 | [0.14]–0.17 |
|  | sect. *Gymnopera* (*x* = 14) | | (3.21)3.42–4.14 | 1.71–2.07 | 0.12–0.15 |
|  | sect. *Ligulatae* (*x* = 14) | | (2.81–)3.13–4.21 | 1.57–2.11 | 0.11–0.15 |
|  | sect. *Trachyphyllum* (*x* = 13) | | 3.00–3.52 | 1.50–1.76 | 0.12–0.14 |
|  | sect. *Porphyrion* (*x* = 13) | | (1.36–)1.43–3.86 | [0.71]–1.93 | [0.05]–0.15 |
|  |  | subsect. *Kabschia* (*x* = 13) | 1.43–3.70 | [0.71]–[1.85] | [0.05]–[0.13] |
|  |  | subsect. *Oppositifoliae* (*x* = 13) | 2.50–3.41 | 1.25–1.70 | 0.10–0.13 |
|  |  | subsect. *Mutatae* (*x* = 13) | (1.36–)3.05–3.84 | 1.52–[1.92] | 0.12–0.15 |
|  |  | subsect. *Squarrosae* (*x* = 13) | 3.28–3.86 | 1.64–1.93 | 0.13–0.15 |
|  | | |  |  |  |
| ***Chrysosplenium*** (*x* = 6–13?) | | | (0.93–)1.94–7.50 | [1.88] and N/A | [0.21] and N/A |
|  | | |  |  |  |
| ***Heuchera*** (*x* = 7) | | | (1.19–)1.68 | 0.84 | 0.06 |
|  | | |  |  |  |
| ***Micranthes*** (*x* = 10–15?) | | | (0.73–)1.33–25.31 | [0.67]–[≤1.54] | [0.07]–[0.14] |
|  | sect. *Stellares* (*x* = ?) | | (0.73–)1.33 | [0.67] | N/A |
|  | sect. *Melanocentrae* (*x* = 11) | | 1.53–9.26 | [0.7]–[≤1.54] | [0.07]–[0.14] |
|  | sect. *Rotundifoliatae* (*x* = ?) | | 1.64–4.40 | [0.82]–[1.10] | N/A |
|  | sect. *Micranthes* (*x* = 11, ?) | | 3.07–25.31 | [1.53] and N/A | [0.14] and N/A |
|  | | |  |  |  |
| ***Mitella*** (*x* = 7) | | | (1.10) | N/A | N/A |
|  | | |  |  |  |
| ***Ozomelis*** (*x* = 7) | | | 0.55 | 0.28 | 0.04 |
