# Supplementary material for: Genome sizes and chromosomal repatterning in the evolution of Saxifraga and other Saxifragaceae
Source: Research Square preprint supplement (doi:10.21203/rs.3.rs-8115725/v1), 2025-11-25
Supplement: Supplementary file 4 [file 2eca9a9be374e446804dbffe.xlsx]

## Sheet: Tabelle1
Genome sizes and chromosomal repatterning in the evolution of Saxifraga and other Saxifragaceae
Natalia Tkach1*, Sebastian Spielau1, David Horák2, Martin Röser1*
1 Martin Luther University Halle-Wittenberg, Institute of Biology, Geobotany and Botanical Garden, Am Kirchtor 1, 06108 Halle (Saale), Germany
2 Palacký University Olomouc, Faculty of Science, Department of Botany, Šlechtitelů 27, 78371 Olomouc, Czech Republic
*Corresponding authors: natalia.tkach@botanik.uni-halle.de and martin.roeser@botanik.uni-halle.de
Online Resource 1. Examined taxa of Saxifraga and other Saxifragaceae genera, including the measured 2C values and their standard deviation, 1C values, 2n chromosome number recorded in CCDB (2025) and other sources as indicated, ploidy level, chromosome base number x, calculated 1Cx values and mean chromosome DNA content (MC), FCM standard species used, kind of processed sample tissue, and collec…
Taxon	Section	Subsection	2C value [pg]	± SD	1C value [Mpb]	2n from CCDB (2025); (number unlikely); * infraspecific taxa not indicated; most frequent number in bold print	2n other source with reference	Ploidy level of sample	Chromosome base number x	1Cx value [pg]	MC [pg]	FCM standard	Sample/standard ratio	Type of plant tissue	Provenance and voucher information
Saxifraga aizoides L.	Porphyrion Tausch	Mutatae (Engl. & Irmsch.) Gornall	3.04538	0.0344881	1489.19	26		2x	13	1.52269	0.11713	Zea mays L. 'CE-777'	0.560844	silica gel-dried	cult. in Waterperry Gardens (UK)
Saxifraga aizoides L.	Porphyrion Tausch	Mutatae (Engl. & Irmsch.) Gornall	3.34985	0.0135946	1638.08	26		2x	13	1.67492	0.12884	Zea mays L. 'CE-777'	0.616915	fresh	cult. BG Brockengarten Harz (Germany) acc. no. 11-B-0209; photographic vouchers (S. Spielau, N. Tkach)
Saxifraga aizoides L.	Porphyrion Tausch	Mutatae (Engl. & Irmsch.) Gornall	3.71355	0.0557287	1815.92	26		2x	13	1.85677	0.142829	Zea mays L. 'CE-777'	0.683894	silica gel-dried	Austria, Styria, Rottenmann Tauern, 47°26'27.74" N 14°25'9,48" E, ca. 1950 m, 02.09.2017. M. Röser 11313 & N. Tkach (HAL)
Saxifraga aizoides L.	Porphyrion Tausch	Mutatae (Engl. & Irmsch.) Gornall	3.80488	0.0617882	1860.59	26		2x	13	1.90244	0.146342	Zea mays L. 'CE-777'	0.700715	silica gel-dried	Austria, Alps, Hochschwab, 1680 m; cult. in Arktisch-Alpiner Garten Chemnitz (Germany) acc. no. AC-2067
Saxifraga ×alpigena Harry Sm. (= S. andersonii Engl. × S. quadrifaria Engl. & Irmsch.; fide Bürgel 2007)	Porphyrion Tausch	Kabschia (Engl.) Rouy & Camus	2.22272	0.0605495	1086.91	—		[2x]	[13]	[1.11]	[0.09]	Zea mays L. 'CE-777'	0.409341	silica gel-dried	origin unknown, sample obtained from J. Ebersbach (Leipzig)
Saxifraga andersonii Engl.	Porphyrion Tausch	Kabschia (Engl.) Rouy & Camus	2.32513	0.0146113	1136.99	26		2x	13	1.16	0.0894281	Zea mays L. 'CE-777'	0.428201	silica gel-dried	cult. private saxifrage collection D. Horák (Bystřice pod Hostýnem, Czech Republic)
Saxifraga androsacea L.	Saxifraga	Androsaceae (Engl. & Irmsch.) Tkach, Röser & M.H.Hoffm.	1.46	0.016411	713.94	(16), 66, 88, ca. 112, ca. 120, 124, ca. 128, 128, 154, 192, ca. 198, 198, 206–220, 208, 210, 220		?	[11 ?]	?	?	Solanum lycopersicum L. 'Stupické polní rané'	0.744898	silica gel-dried	Austria, Styria, Wölz Tauern, 2196 m, 47°16'14.0"N, 14°20'39.2"E, 16.06.2018. M. Röser 11354 & N. Tkach (HAL)
Saxifraga androsacea L.	Saxifraga	Androsaceae (Engl. & Irmsch.) Tkach, Röser & M.H.Hoffm.	1.56	0.0170966	762.84	(16), 66, 88, ca. 112, ca. 120, 124, ca. 128, 128, 154, 192, ca. 198, 198, 206–220, 208, 210, 221		?	[11 ?]	?	?	Solanum lycopersicum L. 'Stupické polní rané'	0.795918	silica gel-dried	Austria, Styria, Wölz Tauern, 2125 m, 47°16'29.2"N 14°21'15.9"E, 13.06.2018. M. Röser 11340 & N. Tkach (HAL)
Saxifraga arachnoidea Sternb.	Saxifraga	Arachnoideae (Engl. & Irmsch.) Tkach, Röser & M.H.Hoffm.	1.01068	0.00160552	494.223	66; previously published number of 56 recorded as erroneous by Damboldt J (1965) Chromosomenzahlen einiger südalpiner Endemiten. Ber Deutsch Bot Ges 78(9), 373–376. https://doi.org/10.1111/j.1438-8677.1966.tb02059.x		6x	11	0.168447	0.0157919	Raphanus sativus L. 'Saxa'	0.910523	fresh	cult. alpine garden of M. Rothmeier (Büchenbach, Germany); plants grown from seed from the Alps; photographic voucher (N. Tkach)
Saxifraga aretioides Lapeyr.	Porphyrion Tausch	Kabschia (Engl.) Rouy & Camus	1.7324	0.0143059	847.142	26		2x	13	0.866199	0.0666307	Raphanus sativus L. 'Saxa'	1.56072	silica gel-dried	Spain, Pyrenees, Torla, Puerto de Bujaruelo, 1900 m, S. Jeßen & L. Lehmann, 10.09.2001; cult. Arktisch-Alpiner Garten Chemnitz (Germany) acc. no. AC-2083
Saxifraga aristulata Hook.f. & Thomson	Ciliatae Haw.	Hirculoideae (Engl. & Irmsch.) Gornall (Clade 3)	3.53316	0.0247402	1727.72	16		2x	8	1.76658	0.22	Zea mays L. 'CE-777'	0.650674	silica gel-dried	China, Sichuan, Songpan, Monigou Mountains, 32°39'54.15"N 103°30'48.05"E, 3330 m, 10.08.2018, N. Tkach 462, S. Gebauer & A. Favre																								Ciliatae
Saxifraga aristulata Hook.f. & Thomson	Ciliatae Haw.	Hirculoideae (Engl. & Irmsch.) Gornall (Clade 3)	11.4637	0.311992	5605.73	16		[≥6x]	8	[≤1.91]	[≤0.24]	Secale cereale L. 'Daňkovské'	0.70807	silica gel-dried	China, Sichuan, Yading, 28°21.909'N 100°19.870'E, 4722 m, 14.06.2013, A. Favre & S. Matuszak 215 (FR, KUN)
Saxifraga aspera L.	Trachyphyllum (Gaudin) W.D.J.Koch		3.05252	0.0194792	1492.68	26		2x	13	1.52626	0.117405	Zea mays L. 'CE-777'	0.562158	fresh	cult. BG Brockengarten Harz (Germany) acc. no. 11-B-0227; photographic vouchers (S. Spielau, N. Tkach)
Saxifraga aspera L.	Trachyphyllum (Gaudin) W.D.J.Koch		3.06687	0.00730554	1499.7	26		2x	13	1.54032	0.117405	Zea mays L. 'CE-777'	0.564801	fresh	cult. BG Brockengarten Harz (Germany); photographic voucher (N. Tkach)
Saxifraga aspera L.	Trachyphyllum (Gaudin) W.D.J.Koch		3.08065	0.00903852	1506.44	26		2x	13	1.54032	0.118486	Zea mays L. 'CE-777'	0.567339	fresh	cult. BG Brockengarten Harz (Germany) acc. no. 18-B-0020; photographic voucher (N. Tkach)
Saxifraga aspera L.	Trachyphyllum (Gaudin) W.D.J.Koch		3.52422	0.0871105	1723.34	26		2x	13	1.76211	0.135547	Zea mays L. 'CE-777'	0.649028	silica gel-dried	Switzerland, Valais, Finhaut Village, 46°05'15.94"N 6°58'53.29"E, 1370m, 2013, A. Favre 13029 (LZ223490, LZ223491)
Saxifraga austromontana Wiegand	Bronchiales DeChaine		4.37254	0.0827657	2138.17	—	26 in: Webb & Gornall (1989): p. 283 and in: Calder & Savile 1959, p. 234; counts by R.J. Moore	[4x]	[13]	[1.09]	[0.08]	Pisum sativum L. 'Ctirad'	0.481027	silica gel-dried	USA, Washington, Cascade Mtns; cult. BG Munich (Germany) IPEN: US-0-M-2006/0173; photographic voucher (N. Tkach)
Saxifraga berica (Bég.) D.A.Webb	Saxifraga	Arachnoideae (Engl. & Irmsch.) Tkach, Röser & M.H.Hoffm.	0.86673	0.00628943	423.831	—		[6x]	[11]	[0.14]	[0.01]	Solanum lycopersicum L. 'Stupické polní rané'	0.442209	fresh	cult. alpine garden of M. Rothmeier (Büchenbach, Germany); plants grown from seed from the Alps; photographic voucher (N. Tkach)
Saxifraga berica (Bég.) D.A.Webb × petraea L.	Saxifraga	Arachnoideae (Engl. & Irmsch.) Tkach, Röser & M.H.Hoffm.	0.969912	0.00186093	474.287	—		[6x]	[11]	[0.16]	[0.02]	Raphanus sativus L. 'Saxa'	0.873795	fresh	cult. alpine garden of M. Rothmeier (Büchenbach, Germany); artificial cross of plants grown from seed from the Alps; photographic voucher (N. Tkach)
Saxifraga biternata Boiss.	Saxifraga	Saxifraga	2.1091	0.0707669	1031.35	66		6x	11	0.35	0.0319561	Zea mays L. 'CE-777'	0.388416	silica gel-dried	Spain, Andalucía, El Torcal, 970 m; cult. BG Munich (Germany) IPEN: ES-0-M-2006/1581; photographic voucher (N. Tkach)
Saxifraga bronchialis L. subsp. bronchialis	Bronchiales DeChaine		7.55888	0.332953	3696.29	26*, (38*), 48*, 49*, 90*, >100*, ca. 150*, 150*		[8x]	[13]	[0.95]	[0.07]	Secale cereale L. 'Daňkovské'	0.466886	silica gel-dried	Russia, Baikal Lake, Irkutsk, 21.09.2015, A. Jochum 1502 (LZ224156)
Saxifraga bryoides L.	Trachyphyllum (Gaudin) W.D.J.Koch		2.99804	0.020312	1466.04	26		2x	13	1.49902	0.115309	Zea mays L. 'CE-777'	0.552126	fresh	cult. BG Brockengarten Harz (Germany) acc. no. 11-B-0106; photographic vouchers (S. Spielau, N. Tkach)
Saxifraga bryoides L.	Trachyphyllum (Gaudin) W.D.J.Koch		3.19401	0.044171	1561.87	26		2x	13	1.597	0.122846	Zea mays L. 'CE-777'	0.588215	silica gel-dried	Austria, Styria, Wölz Tauern, 2215 m, 47°16'14.5"N, 14°20'30.2"E, 14.06.2018. M. Röser 11346 & N. Tkach (HAL)
Saxifraga burseriana L.	Porphyrion Tausch	Kabschia (Engl.) Rouy & Camus	2.38591	0.0303048	1166.71	26		2x	13	1.19296	0.0917658	Zea mays L. 'CE-777'	0.439394	silica gel-dried	Austria, Hochobir; cult. private saxifrage collection D. Horák (Bystřice pod Hostýnem, Czech Republic)
Saxifraga burseriana L.	Porphyrion Tausch	Kabschia (Engl.) Rouy & Camus	2.52253	0.016848	1233.52	26		2x	13	1.26127	0.0970205	Zea mays L. 'CE-777'	0.464555	silica gel-dried	Slovenia, Julian Alps, Mangart massif; cult. Arktisch-Alpiner Garten Chemnitz (Germany) acc. no. AC-2068
Saxifraga burseriana L.	Porphyrion Tausch	Kabschia (Engl.) Rouy & Camus	2.53476	0.015211	1239.5	26		2x	13	1.26738	0.0974908	Zea mays L. 'CE-777'	0.466807	silica gel-dried	Austria, Hochobir; cult. private saxifrage collection D. Horák (Bystřice pod Hostýnem, Czech Republic)
Saxifraga burseriana L.	Porphyrion Tausch	Kabschia (Engl.) Rouy & Camus	2.5811	0.0731555	1262.16	26		2x	13	1.29055	0.0992731	Zea mays L. 'CE-777'	0.475341	silica gel-dried	cult. BG Munich (Germany) IPEN: XX-0-M-B/0645; photographic voucher (N. Tkach)
Saxifraga burseriana L.	Porphyrion Tausch	Kabschia (Engl.) Rouy & Camus	2.62119	0.017311	1281.76	26		2x	13	1.31059	0.100815	Zea mays L. 'CE-777'	0.482723	silica gel-dried	cult. BG Tübingen (Germany) acc. no. 5052; photographic voucher (N. Tkach)
Saxifraga caesia L.	Porphyrion Tausch	Squarrosae (Engl. & Irmsch.) Tkach, Röser & M.H.Hoffm.	3.55962	0.0254023	1740.66	24, 26		2x	13	1.77981	0.136909	Zea mays L. 'CE-777'	0.655548	silica gel-dried	Italy, Dolomites, W Lago di Sorapiss, 2300 m; cult. Arktisch-Alpiner Garten Chemnitz (Germany); photographic voucher (N. Tkach)
Saxifraga caesia L.	Porphyrion Tausch	Squarrosae (Engl. & Irmsch.) Tkach, Röser & M.H.Hoffm.	3.60456	0.0120034	1762.63	24, 26		2x	13	1.80228	0.138637	Zea mays L. 'CE-777'	0.663823	silica gel-dried	Austria, East Tyrol, Lienz Dolomites, ca. 2128 m, 46°45'57.6" N 12°47'30.4" E, 06.09.2017. M. Röser 11328 & N. Tkach (HAL)
Saxifraga caesia L.	Porphyrion Tausch	Squarrosae (Engl. & Irmsch.) Tkach, Röser & M.H.Hoffm.	3.85602	0.0240946	1885.59	24, 26		2x	13	1.92801	0.148308	Zea mays L. 'CE-777'	0.710132	silica gel-dried	Austria, Salzburg, Seehorn, 47°31'02.60"N 12°50'42.13"E, 8/2012, A. Favre (LZ)
Saxifraga callosa Sm.	Ligulatae Haw.		3.28233	0.049	1605.06	28		2x	14	1.64	0.12	Zea mays L. 'CE-777'	0.604481	fresh	cult. BG Halle (Germany), alpine garden
Saxifraga callosa Sm.	Ligulatae Haw.		3.50602	0.0246988	1714.44	28		2x	14	1.75	0.13	Zea mays L. 'CE-777'	0.645676	silica gel-dried	France, Alpes Maritimes, Tende region, Tête de Chaudon, 2140 m, 09.07.2000, S. Jeßen & L. Lehmann; cult. Arktisch-Alpiner Garten Chemnitz (Germany) acc. no. AC-1740; photographic voucher (N. Tkach)
Saxifraga callosa Sm.	Ligulatae Haw.		3.54619	0.0655631	1734.09	28		2x	14	1.77	0.13	Zea mays L. 'CE-777'	0.653074	silica gel-dried	Italy, Piemonte, Ligurian Alps, Colle Caprauna, Mt. Armetta, 1600 m, 18.07.2017, L. Lehmann; cult. Arktisch-Alpiner Garten Chemnitz (Germany) acc. no. AC-2069
Saxifraga callosa Sm. cv. 'Albertii'	Ligulatae Haw.		3.28575	0.0277808	1606.73	28*		[2x]	[14]	[1.65]	[0.12]	Zea mays L. 'CE-777'	0.605111	fresh	cult. BG Brockengarten Harz (Germany); photographic vouchers (S. Spielau, N. Tkach)
Saxifraga callosa Sm. cv. 'Albertii'	Ligulatae Haw.		3.29434	0.0109897	1610.93	28*		[2x]	[14]	[1.65]	[0.12]	Zea mays L. 'CE-777'	0.606692	fresh	cult. BG Brockengarten Harz (Germany); photographic voucher (N. Tkach)
Saxifraga callosa Sm. cv. 'Albertii'	Ligulatae Haw.		3.34355	0.0152333	1635	28*		[2x]	[14]	[1.67]	[0.12]	Zea mays L. 'CE-777'	0.615755	fresh	cult. BG Brockengarten Harz (Germany); photographic voucher (N. Tkach)
Saxifraga callosa Sm. subsp. callosa	Ligulatae Haw.		3.32629	0.0125379	1626.56	28		2x	14	1.66	0.12	Zea mays L. 'CE-777'	0.612577	fresh	cult. BG Brockengarten Harz (Germany) acc. no. 92-B-163A; photographic vouchers (S. Spielau, N. Tkach)
Saxifraga candelabrum Franch.	Ciliatae Haw.	Clade 2	6.09005	0.347429	2978.04	—		[4x]	[8]	[1.52]	[0.24]	Secale cereale L. 'Daňkovské'	0.376161	silica gel-dried	China, Yunnan, Mingyong Glacier, 28°27.653'N 98°46.527'E, 2618 m, 28.08.2011, A. Favre & S. Matuszak 171 (FR, KUN)
Saxifraga candelabrum Franch.	Ciliatae Haw.	Clade 2	6.3097	0.0489852	3085.44	—		[4x]	[8]	[1.57]	[0.20]	Secale cereale L. 'Daňkovské'	0.389728	silica gel-dried	China, Yunnan, Shangri-La, 27°51.88'N 99°42.025'E, 3214 m, 28.08.2011, A. Favre & S. Matuszak 162 (FR, KUN)
Saxifraga cardiophylla Franch.	Ciliatae Haw.	Hirculoideae (Engl. & Irmsch.) Gornall (Clade 3)	7.51231	0.154786	3673.52	(48)	32 in: Funamoto, T., Kondo, K., Hong, D.-y., Zhou, S.-l. and Shimada, T. 1998. A karyomorphological comparison of four Saxifraga species collected in the western part of Sichuan Province, China. Chrom. Sci. 2: 103-109.	[4x]	8	[1.88]	[0.23]	Secale cereale L. 'Daňkovské'	0.464009	silica gel-dried	China, Yunnan, Lijiang, 27°06.341'N 100°14.038, 3296 m, 19.08.2011, A. Favre & S. Matuszak 124 (FR, KUN)
Saxifraga cardiophylla Franch.	Ciliatae Haw.	Hirculoideae (Engl. & Irmsch.) Gornall (Clade 3)	7.81804	0.0741302	3823.02	(48)	32 in: Funamoto, T., Kondo, K., Hong, D.-y., Zhou, S.-l. and Shimada, T. 1998. A karyomorphological comparison of four Saxifraga species collected in the western part of Sichuan Province, China. Chrom. Sci. 2: 103-109.	[4x]	8	[1.96]	[0.24]	Secale cereale L. 'Daňkovské'	0.482893	silica gel-dried	China, Yunnan, above Bendiwan, 27°14.55'N 100°06.470'E, 3449 m, 06.09.2012, A. Favre 1208 (FR, KUN)
Saxifraga cartilaginea Willd.	Ligulatae Haw.		3.88619	0.00905009	1900.34	—		[2x]	[14]	[1.94]	[0.14]	Zea mays L. 'CE-777'	0.715688	silica gel-dried	Georgia, Caucasus, Upper Svaneti, Shdugra waterfall, 43°7'45.271"N 42°35'43.578"E, 2164 m, 17.07.2025, N. Tkach 886 (HAL)
Saxifraga catalaunica Boiss. & Reut.	Ligulatae Haw.		3.88839	0.0488148	1901.42	—		[2x]	[14]	[1.94]	[0.14]	Zea mays L. 'CE-777'	0.716094	silica gel-dried	Spain, Catalonia; cult. Arktisch-Alpiner Garten Chemnitz (Germany); photographic voucher (N. Tkach)
Saxifraga caucasica Sommier & Levier	Porphyrion Tausch	Kabschia (Engl.) Rouy & Camus	1.59813	0.0172536	781.483	—		[2x]	[13]	[0.80]	[0.06]	Glycine max Merr. 'Polanka'	0.63925	fresh	cult. BG Brockengarten Harz (Germany); photographic voucher (N. Tkach)
Saxifraga cebennensis Rouy & E.G.Camus	Saxifraga	Saxifraga	1.2691	0.007	620.588	(26), 32	ca. 32 in: Parker, D.M. 1982. Cytotaxonomic, ecological and conservation studies on the dactyloid saxifrages, (Saxifraga L. section Dactyloides Tausch) of the British Isles. PhD. thesis, University of Liverpool. Available at: https://livrepository.liverpool.ac.uk/3175596/1/345208.pdf	[2x]	[13]	[0.63]	[0.05]	Solanum lycopersicum L. 'Stupické polní rané'	0.647498	fresh	cult. BG Brockengarten Harz (Germany) acc. no. 2000-B-43; photographic voucher (S. Spielau)
Saxifraga cespitosa L.	Saxifraga	Saxifraga	4.34412	0.0269902	2124.28	(52), 56, 60, 63, 65, 64, 78, ca. 80, 80		?	?	?	?	Pisum sativum L. 'Ctirad'	0.477901	fresh	cult. BG Brockengarten Harz (Germany) acc. no. 93-B-378A; photographic voucher (N. Tkach)
Saxifraga cespitosa L.	Saxifraga	Saxifraga	5.56482	0.0122132	2721.2	(52), 56, 60, 63, 65, 64, 78, ca. 80, 80		?	?	?	?	Pisum sativum L. 'Ctirad'	0.612192	silica gel-dried	cult. BG Tübingen (Germany) acc. no. 5227; photographic voucher (N. Tkach)
Saxifraga charadzeae Otsch.	Porphyrion Tausch	Kabschia (Engl.) Rouy & Camus	1.68781	0.0120088	825.338	—		[2x]	[13]	[0.85]	[0.07]	Glycine max Merr. 'Polanka'	0.675123	fresh	cult. BG Brockengarten Harz (Germany); photographic voucher (N. Tkach)
Saxifraga charadzeae Otsch.	Porphyrion Tausch	Kabschia (Engl.) Rouy & Camus	1.65732	0.00342629	810.43	—		[2x]	[13]	[0.83]	[0.06]	Glycine max Merr. 'Polanka'	0.662928	fresh	cult. BG Brockengarten Harz (Germany); photographic voucher (S. Spielau)
Saxifraga cinerea Harry Sm.	Porphyrion Tausch	Kabschia (Engl.) Rouy & Camus	2.59094	0.0109121	1266.97	—		[2x]	[13]	[1.30]	[0.10]	Zea mays L. 'CE-777'	0.477154	silica gel-dried	Nepal, Bhratang; cult. private saxifrage collection D. Horák (Bystřice pod Hostýnem, Czech Republic)
Saxifraga cochlearis Rchb.	Ligulatae Haw.		3.47967	0.017933	1701.56	28		2x	14	1.73984	0.133834	Zea mays L. 'CE-777'	0.640824	silica gel-dried	France, Alpes Maritimes, Roya Valley, 1000 m, G. Stopp 1998; cult. Arktisch-Alpiner Garten Chemnitz (Germany) acc. no. AC-1372
Saxifraga cotyledon L.	Ligulatae Haw.		3.22271	0.00812434	1575.91	28		2x	14	1.61135	0.115097	Zea mays L. 'CE-777'	0.593501	fresh	cult. BG Brockengarten Harz (Germany) acc. no. 94-B-767A; photographic vouchers (S. Spielau, N. Tkach)
Saxifraga cotyledon L.	Ligulatae Haw.		3.63886	0.0388135	1779.4	28		2x	14	1.81943	0.139956	Zea mays L. 'CE-777'	0.67014	silica gel-dried	Italy, Piemonte, Finero, 850 m, S. Jeßen 28.07.1997; cult. Arktisch-Alpiner Garten Chemnitz (Germany) acc. no. AC-1381; photographic voucher (N. Tkach)
Saxifraga crustata Vest	Ligulatae Haw.		3.70911	0.0476185	1813.75	28		2x	14	1.85455	0.132468	Zea mays L. 'CE-777'	0.683077	fresh	cult. BG Brockengarten Harz (Germany); photographic voucher (S. Spielau)
Saxifraga crustata Vest	Ligulatae Haw.		4.02451	0.0177411	1967.98	28		2x	14	2.01225	0.143732	Zea mays L. 'CE-777'	0.741161	silica gel-dried	Slovenia, Kamnik Alps, Logar Valley, 1200 m, L. Lehmann 07.2016; cult. Arktisch-Alpiner Garten Chemnitz (Germany) acc. no. AC-2071
Saxifraga crustata Vest	Ligulatae Haw.		4.21127	0.218798	2059.31	28		2x	14	2.10564	0.150403	Zea mays L. 'CE-777'	0.775557	silica gel-dried	Slovenia, Karst, Nanos Mountain, 1200 m, L. Lehmann 15.07.2018; cult. Arktisch-Alpiner Garten Chemnitz (Germany) acc. no. AC-2070
Saxifraga cuneata Willd.	Saxifraga	Saxifraga	2.94	0.022	1437.66	28, 36, ca. 38, 38		?	?	?	?	Zea mays L. 'CE-777'	0.541436	fresh	cult. BG Brockengarten Harz (Germany) acc. no. 11-B-0218; photographic vouchers (S. Spielau, N. Tkach)
Saxifraga cuneifolia L.	Gymnopera D.Don		3.94239	0.154983	1927.83	28		2x	14	1.9712	0.1408	Zea mays L. 'CE-777'	0.726039	silica gel-dried	Switzerland, Valais, Val d'en bas, A. Favre (LZ)
Saxifraga cymbalaria L.	Cymbalaria Griseb.		1.87214	0.00585441	915.474	18 (refers to plants of S. cymbalaria from the Caucasus: Davlianidze MT (1984) Investigatio cytogeographica speciorum nonnullarum altimontanarum e Caucaso. Not Syst Georg Inst Bot Thbilissi 40: 59–66)		2x	9	0.936068	0.104008	Glycine max Merr. 'Polanka'	0.748854	fresh	Georgia, Caucasus, Upper Svaneti, Adishi, 43°1'59.065"N 42°52'23.587"E, 2122 m, 16.07.2025, N. Tkach 890 (HAL)
Saxifraga cymbalaria L.	Cymbalaria Griseb.		1.93477	0.0127398	946.1	18 (refers to plants of S. cymbalaria from the Caucasus: Davlianidze MT (1984) Investigatio cytogeographica speciorum nonnullarum altimontanarum e Caucaso. Not Syst Georg Inst Bot Thbilissi 40: 59–66)		2x	9	0.967383	0.107487	Glycine max Merr. 'Polanka'	0.773906	silica gel-dried	Georgia, Caucasus, Upper Svaneti, Becho, 43°3'53.327"N 42°35'35.152"E, 1922 m, 16.07.2025, N. Tkach 885 (HAL)
Saxifraga derbekii Sipliv.	Bronchiales DeChaine		2.24246	0.0105991	1096.56	—		[2x]	[13]	[1.12]	[0.09]	Zea mays L. 'CE-777'	0.412977	fresh	cult. BG Brockengarten Harz (Germany) acc. no. 20-B-0016; photographic vouchers (S. Spielau, N. Tkach)
Saxifraga desoulavyi Oett.	Porphyrion Tausch	Kabschia (Engl.) Rouy & Camus	1.70914	0.00907053	835.767	—		[2x]	[13]	[0.86]	[0.07]	Glycine max Merr. 'Polanka'	0.683654	fresh	cult. BG Brockengarten Harz (Germany); photographic voucher (N. Tkach)
Saxifraga desoulavyi Oett.	Porphyrion Tausch	Kabschia (Engl.) Rouy & Camus	1.68196	0.00526116	822.48	—		[2x]	[13]	[0.84]	[0.06]	Glycine max Merr. 'Polanka'	0.672785	fresh	cult. BG Brockengarten Harz (Germany); photographic vouchers (S. Spielau, N. Tkach)
Saxifraga cf. desoulavyi Oett.	Porphyrion Tausch	Kabschia (Engl.) Rouy & Camus	1.77811	0.00581547	869.497	—		[2x]	[13]	[0.89]	[0.07]	Glycine max Merr. 'Polanka'	0.711245	fresh	cult. BG Brockengarten Harz (Germany); photographic vouchers (S. Spielau, N. Tkach)
Saxifraga cf. desoulavyi Oett.	Porphyrion Tausch	Kabschia (Engl.) Rouy & Camus	1.74613	0.019641	853.859	—		[2x]	[13]	[0.87]	[0.07]	Glycine max Merr. 'Polanka'	0.698453	fresh	cult. BG Brockengarten Harz (Germany) acc. no. 92-B-249; photographic vouchers (S. Spielau, N. Tkach)
Saxifraga cf. desoulavyi Oett.	Porphyrion Tausch	Kabschia (Engl.) Rouy & Camus	1.76403	0.0507922	862.612	—		[2x]	[13]	[0.88]	[0.07]	Glycine max Merr. 'Polanka'	0.705613	fresh	cult. BG Brockengarten Harz (Germany) acc. no. 92-B-249; photographic vouchers (S. Spielau, N. Tkach)
Saxifraga diapensioides Bellardi	Porphyrion Tausch	Kabschia (Engl.) Rouy & Camus	2.56769	0.0394279	1255.6	26		2x	13	1.28384	0.0987572	Zea mays L. 'CE-777'	0.47287	silica gel-dried	France, Alpes-Maritines, Col de Larche, NNW below Tête des Blaves, 2410 m, S. Jeßen & L. Lehmann; cult. Arktisch-Alpiner Garten Chemnitz (Germany) acc. no. AC-1737; photographic voucher (N. Tkach)
Saxifraga dinnikii Schmalh. ex Akinf.	Porphyrion Tausch	Kabschia (Engl.) Rouy & Camus	1.7537	0.0153887	857.562	—		[2x]	[13]	[0.88]	[0.07]	Raphanus sativus L. 'Saxa'	1.57991	silica gel-dried	Russia, Kabardino-Balkaria, Verkhnyaya Balkaria; cult. private saxifrage collection D. Horák (Bystřice pod Hostýnem, Czech Republic)
Saxifraga erioblasta Boiss. & Reut.	Saxifraga	Saxifraga	1.96011	0.034639	958.493	32–34		?	?	?	?	Raphanus sativus L. 'Saxa'	1.76586	silica gel-dried	cult. BG Munich (Germany) IPEN: XX-0-M-2011/1773; photographic voucher (N. Tkach)
Saxifraga exarata Vill.	Saxifraga	Saxifraga	1.63294	0.00898012	798.508	20, 20–22, 24, ca. 68, ca. 136; additionally subsp. leucantha intermediate between S. exarata and S. moschata with mit 48, 50	ca. 26 in: Parker, D.M. 1982. Cytotaxonomic, ecological and conservation studies on the dactyloid saxifrages, (Saxifraga L. section Dactyloides Tausch) of the British Isles. PhD. thesis, University of Liverpool. Available at: https://livrepository.liverpool.ac.uk/3175596/1/345208.pdf	?	?	?	?	Glycine max Merr. 'Polanka'	0.653176	fresh	Georgia, Caucasus, Upper Svaneti, Ushguli, 42°55'6.104"N 43°1'10.097"E, 2142 m, 16.07.2025, N. Tkach 893 (HAL)
Saxifraga exarata Vill.	Saxifraga	Saxifraga	1.63406	0.00252038	799.055	20, 20–22, 24, ca. 68, ca. 136; additionally subsp. leucantha intermediate between S. exarata and S. moschata with mit 48, 50	ca. 26 in: Parker, D.M. 1982. Cytotaxonomic, ecological and conservation studies on the dactyloid saxifrages, (Saxifraga L. section Dactyloides Tausch) of the British Isles. PhD. thesis, University of Liverpool. Available at: https://livrepository.liverpool.ac.uk/3175596/1/345208.pdf	?	?	?	?	Glycine max Merr. 'Polanka'	0.653624	fresh	Georgia, Caucasus, Upper Svaneti, Ushguli, 42°55'6.104"N 43°1'10.097"E, 2142 m, 16.07.2025, N. Tkach 892 (HAL)
Saxifraga exarata Vill.	Saxifraga	Saxifraga	2.87001	0.0247009	1403.44	20, 20–22, 24, ca. 68, ca. 136; additionally subsp. leucantha intermediate between S. exarata and S. moschata with mit 48, 50	ca. 26 in: Parker, D.M. 1982. Cytotaxonomic, ecological and conservation studies on the dactyloid saxifrages, (Saxifraga L. section Dactyloides Tausch) of the British Isles. PhD. thesis, University of Liverpool. Available at: https://livrepository.liverpool.ac.uk/3175596/1/345208.pdf	?	?	?	?	Zea mays L. 'CE-777'	0.528548	fresh	cult. BG Brockengarten Harz (Germany); photographic voucher (N. Tkach)
Saxifraga exarata Vill.	Saxifraga	Saxifraga	1.96011	0.034639	958.493	20, 20–22, 24, ca. 68, ca. 136; additionally subsp. leucantha intermediate between S. exarata and S. moschata with mit 48, 50	ca. 26 in: Parker, D.M. 1982. Cytotaxonomic, ecological and conservation studies on the dactyloid saxifrages, (Saxifraga L. section Dactyloides Tausch) of the British Isles. PhD. thesis, University of Liverpool. Available at: https://livrepository.liverpool.ac.uk/3175596/1/345208.pdf	?	?	?	?	Zea mays L. 'CE-777'	0.360978	fresh	cult. BG Brockengarten Harz (Germany); photographic vouchers (S. Spielau, N. Tkach)
Saxifraga federici-augusti Biasol.	Porphyrion Tausch	Kabschia (Engl.) Rouy & Camus	2.18653	0.00946906	1069.21	26*		[2x]	[13]	[1.09]	[0.08]	Zea mays L. 'CE-777'	0.402676	fresh	cult. BG Brockengarten Harz (Germany); photographic vouchers (S. Spielau, N. Tkach)
Saxifraga federici-augusti Biasol.	Porphyrion Tausch	Kabschia (Engl.) Rouy & Camus	2.17709	0.00929822	1064.6	26*		[2x]	[13]	[1.09]	[0.08]	Zea mays L. 'CE-777'	0.400937	fresh	cult. BG Brockengarten Harz (Germany); photographic vouchers (S. Spielau, N. Tkach)
Saxifraga federici-augusti Biasol. subsp. federici-augusti	Porphyrion Tausch	Kabschia (Engl.) Rouy & Camus	2.64727	0.0314001	1294.51	26*		[2x]	[13]	[1.33]	[0.10]	Zea mays L. 'CE-777'	0.487526	silica gel-dried	Albania, Prokletije mts.; cult. private saxifrage collection D. Horák (Bystřice pod Hostýnem, Czech Republic)
Saxifraga federici-augusti subsp. grisebachii (Degen & Dörfl.) D.A.Webb	Porphyrion Tausch	Kabschia (Engl.) Rouy & Camus	2.49573	0.0112371	1220.41	26		2x	13	1.25	0.1	Zea mays L. 'CE-777'	0.459618	silica gel-dried	Greece, Vermio mts.; cult. private saxifrage collection D. Horák (Bystřice pod Hostýnem, Czech Republic)
Saxifraga federici-augusti subsp. grisebachii (Degen & Dörfl.) D.A.Webb	Porphyrion Tausch	Kabschia (Engl.) Rouy & Camus	2.58939	0.0278054	1266.21	26		2x	13	1.29	0.1	Zea mays L. 'CE-777'	0.476868	silica gel-dried	North Macedonia, Stogovo, 1990 m; cult. Arktisch-Alpiner Garten Chemnitz (Germany) acc. no. AC-2074; photographic voucher (S. Spielau)
Saxifraga ferdinandi-coburgi Kellerer & Sünd.	Porphyrion Tausch	Kabschia (Engl.) Rouy & Camus	1.89463	0.0120985	926.473	26		2x	13	0.947314	0.0728703	Glycine max Merr. 'Polanka'	0.757851	fresh	cult. BG Brockengarten Harz (Germany); photographic voucher (S. Spielau)
Saxifraga ferdinandi-coburgi Kellerer & Sünd.	Porphyrion Tausch	Kabschia (Engl.) Rouy & Camus	2.20248	0.0673053	1077.01	26		2x	13	1.10124	0.0847106	Glycine max Merr. 'Polanka'	0.88099	silica gel-dried	Bulgaria, Pirin Mts., Vichren; cult. private collection D. Horák (Bystřice pod Hostýnem, Czech Republic)
Saxifraga ferdinandi-coburgi Kellerer & Sünd.	Porphyrion Tausch	Kabschia (Engl.) Rouy & Camus	2.25939	0.0166826	1104.84	26		2x	13	1.1297	0.0868997	Glycine max Merr. 'Polanka'	0.903757	silica gel-dried	Bulgaria, Pirin, 2200 m; cult. Arktisch-Alpiner Garten Chemnitz (Germany) acc. no. AC-2072; photographic voucher (N. Tkach)
Saxifraga filicaulis Wall. ex Ser.	Ciliatae Haw.	Clade 1	2.63	0.0540242	1286.07	16, 24, 32	16 in: Kumar, S. Kumari, S., Gupta, R.C., Sharma, V.K. 2013. Additions to the cytology of Saxifraga (Saxifragaceae) from the Western Himalayas, India. Botanica Serbica 37(2): 147-153.	2x	8	1.32	0.16	Zea mays L. 'CE-777'	0.484346	silica gel-dried	China, Yunnan, between Bashuitai and Zhanddian, 26°20.524'N 99°50.167'E, 2185 m, 18.06.2013, A. Favre 1203 (FR, KUN)
Saxifraga filicaulis Wall. ex Ser.	Ciliatae Haw.	Clade 1	2.86	0.0242933	1398.54	16, 24, 32	16 in: Kumar, S. Kumari, S., Gupta, R.C., Sharma, V.K. 2013. Additions to the cytology of Saxifraga (Saxifragaceae) from the Western Himalayas, India. Botanica Serbica 37(2): 147-153.	2x	8	1.43	0.18	Zea mays L. 'CE-777'	0.526703	silica gel-dried	China, Yunnan, Bashuitai, 27°42.486'N 100°01.526'E, 3374 m, 11.06.2013, A. Favre & S. Matuszak 163 (FR, KUN)
Saxifraga filicaulis Wall. ex Ser.	Ciliatae Haw.	Clade 1	4.89	0.101519	2391.21	16, 24, 32	16 in: Kumar, S. Kumari, S., Gupta, R.C., Sharma, V.K. 2013. Additions to the cytology of Saxifraga (Saxifragaceae) from the Western Himalayas, India. Botanica Serbica 37(2): 147-153.	[4x]	8	[1.22]	[0.15]	Pisum sativum L. 'Ctirad'	0.537954	silica gel-dried	China, Yunnan, between Shangri-la and Chatreng, 28°34.305'N 99°50.031'E, 4098 m, 30.08.2011, A. Favre & S. Matuszak 184 (FR, KUN)
Saxifraga filicaulis Wall. ex Ser.	Ciliatae Haw.	Clade 1	5.09	0.0387908	2489.01	16, 24, 32	16 in: Kumar, S. Kumari, S., Gupta, R.C., Sharma, V.K. 2013. Additions to the cytology of Saxifraga (Saxifragaceae) from the Western Himalayas, India. Botanica Serbica 37(2): 147-153.	[4x]	8	[1.27]	[0.16]	Pisum sativum L. 'Ctirad'	0.559956	silica gel-dried	China, Yunnan, Bashuitai, 27°31.071'N 100°00.295'E, 3374 m, 07.06.2013, A. Favre & S. Matuszak 140 (FR, KUN)
Saxifraga filicaulis Wall. ex Ser.	Ciliatae Haw.	Clade 1	6.26726	0.0279144	3064.69	16, 24, 32	16 in: Kumar, S. Kumari, S., Gupta, R.C., Sharma, V.K. 2013. Additions to the cytology of Saxifraga (Saxifragaceae) from the Western Himalayas, India. Botanica Serbica 37(2): 147-153.	[4x ?]	8	[1.57]	[0.20]	Pisum sativum L. 'Ctirad'	0.689468	silica gel-dried	China, Sichuan, Songpan, Tianhuashan pass, 4200 m, N. Tkach 452, S. Gebauer, A. Favre (HAL)
Saxifraga flexilis W.W.Sm.	Ciliatae Haw.	Clade 2	9.82099	0.0785763	4802.46	—		[6x]	[8]	[1.64]	[0.20]	Secale cereale L. 'Daňkovské'	0.606608	silica gel-dried	China, SW Sichuan, 4300 m, sample obtained from J. Ebersbach (Leipzig)
Saxifraga fortunei Hook.	Irregulares Haw.		1.83268	0.026	896.183	—	22 in: Wakabayashi M. 1973. On Saxifraga sect. Diptera of Japan, with description of a new species. Acta phytotaxon. et geobot. 25(4-6): 154-169. https://doi.org/10.18942/bunruichiri.KJ00001078111; and in: Yamamoto, N., Ikeda, H. and Hoshino, T. 2008. Cytotaxonomical studies of flowering plants in Yakushima Island, Kagoshima Prefecture, Japan Part I: dwarf taxa. J. Phytogeogr. Taxon. 56: 79-93.	2x	11	0.92	0.0833038	Raphanus sativus L. 'Saxa'	1.65107	silica gel-dried	cult. BG Munich (Germany) IPEN: XX-0-M-B/0500; photographic voucher (N. Tkach)
Saxifraga fragosoi Sennen	Saxifraga	Saxifraga	1.73211	0.0367861	847.003	26 (obviously wrong cited from Gallego Martin, F., Sanchez Anta, M.A. (1986) Números cromosomaticos de plantas occidentales, 376-384. Anal. Jard. Bot. Madrid. 43(1): 143-146, in which n=26 and 2n=52was reported), 34, 36, 52		4x	13	0.43	0.03	Glycine max Merr. 'Polanka'	0.692845	silica gel-dried	Portugal; cult. Arktisch-Alpiner Garten Chemnitz (Germany) acc. no. AC-1847; photographic voucher (N. Tkach)
Saxifraga gemmipara Franch.	Ciliatae Haw.	Clade 1	7.91325	0.214346	3869.58	—		[4x]	[8]	[1.98]	[0.25]	Secale cereale L. 'Daňkovské'	0.488774	silica gel-dried	China, Yunnan, Lijiang, 27°09.257'N 100°15.732'E, 2920 m, 18.08.2011, A. Favre & S. Matuszak 117a (FR, KUN)
Saxifraga gemmipara Franch.	Ciliatae Haw.	Clade 1	10.4717	0.0293298	5120.66	—		[≥6x]	[8]	[≤1.75]	[≤0.22]	Secale cereale L. 'Daňkovské'	0.6468	silica gel-dried	China, Sichuan, Luoji Mountain Scenic Area, 27.09.2011, A. Favre 320 (FR, KUN)
Saxifraga gemmipara Franch.	Ciliatae Haw.	Clade 1	12.12	0.106374	5926.68	—		[≥6x]	[8]	[≤2.02]	[≤0.25]	Secale cereale L. 'Daňkovské'	0.74861	silica gel-dried	China, Sichuan, Luoji Mountain Scenic Area, Puge, Liangshan, 27.09.2011, A. Favre 320 (FR, KUN)
Saxifraga geranioides L.	Saxifraga	Saxifraga	1.65002	0.0079359	806.858	(32), ca. 52		4x	13	0.41	0.03	Solanum lycopersicum L. 'Stupické polní rané'	0.841845	fresh	Spain, Pyrenees, Estany Gran d'Amitges, Tuc de Ratera, 42°36'5.005"N 0°57'12.774"E, 2861 m, 30.07.2024, N. Tkach 860 (HAL)
Saxifraga glacialis Harry Sm.	Ciliatae Haw.	Clade 2	4.01732	0.0310742	1964.47	—		[2x]	[8]	[2.01]	[0.25]	Zea mays L. 'CE-777'	0.739838	silica gel-dried	China, Sichuan, Yading, 28°21.909'N 100°19.870'E, 4722 m, A. Favre & S. Matuszak 213 (FR, KUN)
Saxifraga granulata L.	Saxifraga	Saxifraga	5.9	0.065	2885.1	22, 30, ca. 32, 32, 36, 44, 46, ca. 47, 47, 48, ca. 49, 49, 50, 51, ca. 52, 52, 53, 54, 56, ca. 57, 57, ca. 60. The cited 2n=236 is wrong, because "118" is a collection number "R/118" of Redondo and not a haploid number; see Redondo N, Horjales M (1990) Saxifraga granulata L. en el NW Ibérico. Bol Soc Brot 63: 275–293. Vgl. Skovsted: 2x mit 2n = 32; 4x mit 2n = 64. Redondo & Horj. 1990: meist 2n …		?	?	?	?	Pisum sativum L. 'Ctirad'	0.649065	silica gel-dried	Germany, Saxony, Pillnitz, 21.04.2013, N. Tkach 84 (HAL)
Saxifraga hirsuta L.	Gymnopera D.Don		4.12	0.058	2014.68	28		2x	14	2.06	0.15	Pisum sativum L. 'Ctirad'	0.453245	silica gel-dried	cult. BG Munich (Germany) IPEN: XX-0-M-B/0171; photographic voucher (N. Tkach)
Saxifraga hirsuta L. subsp. hirsuta	Gymnopera D.Don		4.13827	0.063	2023.62	28		2x	14	2.07	0.15	Pisum sativum L. 'Ctirad'	0.455256	silica gel-dried	Spain, Cantabria, S Picos de Europa, S Puerto de Pietrasluengas, 1200 m; cult. Arktisch-Alpiner Garten Chemnitz (Germany) acc. no. AC-1314; photographic voucher (N. Tkach)
Saxifraga hostii subsp. rhaetica (A.Kern. ex Engl.) Braun-Blanq.	Ligulatae Haw.		3.70273	0.0338321	1810.63	28		2x	14	1.85	0.13	Zea mays L. 'CE-777'	0.681902	silica gel-dried	Italy, Bergamasque Alps, Passo Croce Domini, 1800 m, 05.09.2002, S. Jeßen & L. Lehmann; cult. Arktisch-Alpiner Garten Chemnitz (Germany) acc. no. AC-1988; photographic voucher (N. Tkach)
Saxifraga hostii Tausch	Ligulatae Haw.		3.23638	0.02	1582.59	28		2x	14	1.62	0.12	Zea mays L. 'CE-777'	0.596019	fresh	cult. BG Halle (Germany), alpine garden
Saxifraga hostii Tausch subsp. hostii	Ligulatae Haw.		3.2949	0.017122	1611.21	28		2x	14	1.65	0.12	Zea mays L. 'CE-777'	0.606795	fresh	Italy, Carnic Alps, 2019, AGS 18/265; cult. Arktisch-Alpiner Garten Chemnitz (Germany) acc. no. AC-2075
Saxifraga huetiana Boiss.	Cymbalaria Griseb.		1.42	0.002	694.38	18 (refers to plants of S. huetiana from Botanical Garden Copenhagen, not. S. cymbalaria s.str.: Skovsted A (1934) Cytological studies in the tribe Saxifrageae. Dansk Bot Ark 8:1–52)		2x	9	0.71	0.08	Solanum lycopersicum L. 'Stupické polní rané'	0.72449	fresh	cult. BG Halle (Germany), alpine garden
Saxifraga hypericoides Franch.	Ciliatae Haw.	Clade 1	6.24579	0.0315386	3054.19	—		[4x]	[8]	[1.56]	[0.20]	Secale cereale L. 'Daňkovské'	0.385781	silica gel-dried	China, Yunnan, between Shangri-la and Chatreng, 28°34.305'N 99°50.031'E, 4098 m, 30.08.2011, A. Favre & S. Matuszak 186 (FR, KUN)
Saxifraga hypericoides Franch.	Ciliatae Haw.	Clade 1	7.02956	0.0118437	3437.45	—		[4x]	[8]	[1.76]	[0.22]	Secale cereale L. 'Daňkovské'	0.434191	silica gel-dried	China, Yunnan, Lijiang, 27°10.185'N 100°14.589'E, 3517 m, 18.08.2011, A. Favre & S. Matuszak 112 (FR, KUN)
Saxifraga hypericoides Franch.	Ciliatae Haw.	Clade 1	7.58128	0.0608655	3707.25	—		[4x]	[8]	[1.90]	[0.24]	Pisum sativum L. 'Ctirad'	0.834025	silica gel-dried	China, Sichuan, Daocheng, 29°04.661'N 100°21.849'E, 4055 m, 31.08.2011, A. Favre & S. Matuszak 198 (FR, KUN)
Saxifraga hypericoides Franch.	Ciliatae Haw.	Clade 1	12.6061	0.179596	6164.37	—		[≥6x]	[8]	[≤2.10]	[≤0.26]	Secale cereale L. 'Daňkovské'	0.778634	silica gel-dried	China, Yunnan, Shangri-La, 27°48'10.6"N 099°35'40.8"E, 3921 m, 26.08.2014, J. Ebersbach JE14070 (LZ, KUN)
Saxifraga hypnoides L.	Saxifraga	Saxifraga	3.50633	0.00855524	1714.59	26, ca. 30, 39, 40-50, 40, ca. 44, ca. 48, 48, 52, ca. 54, ca.58, ca.60, ca. 64, 64		?	?	?	?	Zea mays L. 'CE-777'	0.645733	fresh	cult. BG Brockengarten Harz (Germany) acc. no. 90-B-97; photographic voucher (N. Tkach)
Saxifraga hypnoides L.	Saxifraga	Saxifraga	3.88302	0.013201	1898.8	26, ca. 30, 39, 40-50, 40, ca. 44, ca. 48, 48, 52, ca. 54, ca.58, ca.60, ca. 64, 64		?	?	?	?	Zea mays L. 'CE-777'	0.715105	fresh	cult. BG Brockengarten Harz (Germany); photographic vouchers (S. Spielau, N. Tkach)
Saxifraga implicans Harry Sm.	Ciliatae Haw.	Hirculoideae (Engl. & Irmsch.) Gornall (Clade 3)	8.30682	0.029434	4062.03	16, 32, 48		[6x]	8	[1.39]	[0.17]	Secale cereale L. 'Daňkovské'	0.513083	silica gel-dried	China, Yunnan, Shangri-La, 27°47'55.7"N 99°35'56.5"E, 3936 m, 26.08.2014, J. Ebersbach JE14066 (LZ, KUN)
Saxifraga implicans Harry Sm.	Ciliatae Haw.	Hirculoideae (Engl. & Irmsch.) Gornall (Clade 3)	14.8653	0.0145166	7269.15	16, 32, 48		[≥10x]	8	[≤1.49]	[≤0.19]	Vicia faba L. 'Inovec'	0.552615	silica gel-dried	China, Yunnan, between Shangri-la and Doacheng, 28°34.305'N 099°50.031'E, 4098 m, 30.08.2011, A. Favre & S. Matuszak 187 (FR, KUN)
Saxifraga iranica Bornm.	Porphyrion Tausch	Kabschia (Engl.) Rouy & Camus	1.42838	0.0143114	698.477	—		[2x]	[13]	[0.71]	[0.05]	Solanum lycopersicum L. 'Stupické polní rané'	0.728764	silica gel-dried	cult. BG Tübingen (Germany); photographic voucher (N. Tkach)
Saxifraga iratiana F.W.Schultz	Saxifraga	Saxifraga	1.2699	0.00363039	620.982	26, (28 refers to S. pubescens subsp. pubescens)	ca. 26 in: Parker, D.M. 1982. Cytotaxonomic, ecological and conservation studies on the dactyloid saxifrages (Saxifraga L. section Dactyloides Tausch) of the British Isles. PhD. thesis, University of Liverpool. Available at: https://livrepository.liverpool.ac.uk/3175596/1/345208.pdf. The CCDB incorrectly ascribes the counts to S. pubescens subsp. pubescens.	2x	13	0.634951	0.05	Solanum lycopersicum L. 'Stupické polní rané'	0.647909	fresh	cult. BG Brockengarten Harz (Germany); photographic vouchers (S. Spielau, N. Tkach)
Saxifraga irrigua M.Bieb.	Saxifraga	Irriguae (Engl. & Irmsch.) Tkach, Spielau, D.Horák & Röser	2.4016	0.0205696	1174.38	44		4x	11	0.6	0.05	Zea mays L. 'CE-777'	0.442283	fresh	Alpine garden of M. Rothmeier (Büchenbach, Germany); plants grown from seed from Crimea; photographic voucher (N. Tkach)
Saxifraga juniperifolia Adams	Porphyrion Tausch	Kabschia (Engl.) Rouy & Camus	2.32843	0.0149408	1138.6	26		2x	13	0.78	0.06	Glycine max Merr. 'Polanka'	0.931374	silica gel-dried	Bulgaria, Pirin, W. Meusel et al. 1981; cult. Arktisch-Alpiner Garten Chemnitz (Germany) acc. no. AC-1405
Saxifraga khiakhensis Holubec & Křivka	Ligulatae Haw.		3.55933	0.00601986	1740.51	—		[2x]	[14]	[1.78]	[0.13]	Zea mays L. 'CE-777'	0.655494	fresh	cult. BG Brockengarten Harz (Germany); photographic voucher (N. Tkach)
Saxifraga kolenatiana Regel	Ligulatae Haw.		3.77949	0.00257522	1848.17	—	n=12 in: Kharadze, A.L., Gvinianidze., Z.I., Davlianidze, M.T. 1976. Investigatio caryologiae taxonorum complexus floristici subnivalis. Not. Syst. Georg. Inst. Bot. Thbilissi 33: 64-91. This publication corrects the previous count of 2n = 12 publisched as Kharadze, A.L. , Gvinianidze., Z.I., Davlianidze, M.T. 1973. On the karyological study of the subnivale frloristical complex. Not. Syst. Georg…	[2x]	[14]	[1.89]	[0.13]	Zea mays L. 'CE-777'	0.696039	fresh	Georgia, Caucasus, Upper Svaneti, Becho, 43°4'13.945"N 42°33'52.060"E, 2422 m, 16.07.2025, N. Tkach 883 (HAL)
Saxifraga kotschyi Boiss.	Porphyrion Tausch	Kabschia (Engl.) Rouy & Camus	1.84493	0.00753505	902.173	—		[2x]	[13]	[0.92]	[0.07]	Glycine max Merr. 'Polanka'	0.737974	fresh	cult. BG Brockengarten Harz (Germany) acc. no. 97-B-1822; photographic voucher (S. Spielau)
Saxifraga likiangensis Franch.	Porphyrion Tausch	Kabschia (Engl.) Rouy & Camus	2.49279	0.0597151	1218.97	—		[2x]	[13]	[1.25]	[0.10]	Zea mays L. 'CE-777'	0.459077	silica gel-dried	China, Nian La, sample obtained from J. Ebersbach (Leipzig),
Saxifraga llonakhensis W.W.Sm.	Ciliatae Haw.	Clade 2	3.73525	0.0415035	1826.54	—		[2x]	[8]	[1.87]	[0.23]	Zea mays L. 'CE-777'	0.687892	silica gel-dried	origin unknown, sample obtained from J. Ebersbach (Leipzig)
Saxifraga longifolia Lapeyr.	Ligulatae Haw.		3.5012	0.017305	1712.08	28		2x	14	1.75	0.13	Zea mays L. 'CE-777'	0.644787	fresh	cult. BG Brockengarten Harz (Germany); photographic voucher (N. Tkach)
Saxifraga longifolia Lapeyr.	Ligulatae Haw.		3.72518	0.0441831	1821.61	28		2x	14	1.86259	0.133042	Zea mays L. 'CE-777'	0.686037	silica gel-dried	France, Hautes Pyrénées; cult. Arktisch-Alpiner Garten Chemnitz (Germany) acc. no. AC-1449
Saxifraga longifolia Lapeyr.	Ligulatae Haw.		3.86814	0.0703369	1891.52	28		2x	14	1.93407	0.138148	Zea mays L. 'CE-777'	0.712364	silica gel-dried	Spain, W Pyrenees, 1860 m; cult. Arktisch-Alpiner Garten Chemnitz (Germany) acc. no. AC-2076
Saxifraga luteoviridis Schott & Kotschy	Porphyrion Tausch	Kabschia (Engl.) Rouy & Camus	1.98	0.0120643	968.22	—		[2x]	[13]	[0.99]	[0.08]	Glycine max Merr. 'Polanka'	0.792	fresh	cult. BG Brockengarten Harz (Germany) acc. no. 10-B-0015; photographic voucher (S. Spielau)
Saxifraga macedonica Degen	Porphyrion Tausch	Kabschia (Engl.) Rouy & Camus	1.72786	0.0273842	844.925	—		[2x]	[13]	[0.87]	[0.07]	Glycine max Merr. 'Polanka'	0.691146	fresh	cult. BG Brockengarten Harz (Germany) acc. no. 05-B-0133; photographic vouchers (S. Spielau, N. Tkach)
Saxifraga macedonica Degen	Porphyrion Tausch	Kabschia (Engl.) Rouy & Camus	1.75294	0.0218547	857.189	—		[2x]	[13]	[0.88]	[0.07]	Glycine max Merr. 'Polanka'	0.701177	fresh	cult. BG Brockengarten Harz (Germany) acc. no. 05-B-0133; photographic vouchers (S. Spielau, N. Tkach)
Saxifraga ×malbyana Horný, Soják & Webr ´Hedwig´ (=S. aretioides Lapeyr. × S. diapensioides Bellardi)	Porphyrion Tausch	Kabschia (Engl.) Rouy & Camus	2.08035	0.0183632	1017.29	—		[2x]	[13]	[1.04]	[0.08]	Glycine max Merr. 'Polanka'	0.83214	fresh	cult. Brockengarten Harz (Germany) acc. no. 2000-B-08, sent out by F. Sündermann 1969 as S. diapensioides; N. Tkach 231 & M. Röser (HAL) and photographic vouchers (N. Tkach, S. Spielau)
Saxifraga marginata Sternb.	Porphyrion Tausch	Kabschia (Engl.) Rouy & Camus	2.25461	0.00376141	1102.5	—	26: as S. marginata var. rocheliana with n = 13 in Skovsted, A. (1934). Cytological studies in the tribe Saxifrageae. Dansk Botanisk Arkiv Udgivet af Dansk Botanisk Forening 8(5): 1–52. Note: CCBD cites a wrong synonym for S. marginata, namely S. carpatica Rchb. ≠ S. carpathica N.Terracc.; checked in the original publikation: Pogan E., Rychlewski J. et al. 1980 a. Further studies in chromosome nu…	[2x]	[13]	[1.13]	[0.09]	Glycine max Merr. 'Polanka'	0.901842	silica gel-dried	Montenegro, Komovi, 2100 m; cult. Arktisch-Alpiner Garten Chemnitz (Germany) acc. no. AC-2078
Saxifraga marginata Sternb.	Porphyrion Tausch	Kabschia (Engl.) Rouy & Camus	2.21862	0.00536829	1084.9	—	26: as S. marginata var. rocheliana with n = 13 in Skovsted, A. (1934). Cytological studies in the tribe Saxifrageae. Dansk Botanisk Arkiv Udgivet af Dansk Botanisk Forening 8(5): 1–52. Note: CCBD cites a wrong synonym for S. marginata, namely S. carpatica Rchb. ≠ S. carpathica N.Terracc.; checked in the original publikation: Pogan E., Rychlewski J. et al. 1980 a. Further studies in chromosome nu…	[2x]	[13]	[1.11]	[0.10]	Glycine max Merr. 'Polanka'	0.887448	silica gel-dried	Croatia, Velebit, near Buljma, 800 m, 06.09.2023, S. Jeßen & L. Lehmann; cult. Arktisch-Alpiner Garten Chemnitz (Germany) acc. no. AC-2077
Saxifraga marginata Sternb.	Porphyrion Tausch	Kabschia (Engl.) Rouy & Camus	2.28973	0.0191879	1119.68	—	26: as S. marginata var. rocheliana with n = 13 in Skovsted, A. (1934). Cytological studies in the tribe Saxifrageae. Dansk Botanisk Arkiv Udgivet af Dansk Botanisk Forening 8(5): 1–52. Note: CCBD cites a wrong synonym for S. marginata, namely S. carpatica Rchb. ≠ S. carpathica N.Terracc.; checked in the original publikation: Pogan E., Rychlewski J. et al. 1980 a. Further studies in chromosome nu…	[2x]	[13]	[1.15]	[0.09]	Glycine max Merr. 'Polanka'	0.91589	silica gel-dried	Bosnia and Hercegovina, Cvrsnica mts.; cult. private collection D. Horák (Bystřice pod Hostýnem, Czech Republic)
Saxifraga marginata Sternb.	Porphyrion Tausch	Kabschia (Engl.) Rouy & Camus	2.29249	0.0119215	1121.03	—	26: as S. marginata var. rocheliana with n = 13 in Skovsted, A. (1934). Cytological studies in the tribe Saxifrageae. Dansk Botanisk Arkiv Udgivet af Dansk Botanisk Forening 8(5): 1–52. Note: CCBD cites a wrong synonym for S. marginata, namely S. carpatica Rchb. ≠ S. carpathica N.Terracc.; checked in the original publikation: Pogan E., Rychlewski J. et al. 1980 a. Further studies in chromosome nu…	[2x]	[13]	[1.15]	[0.09]	Glycine max Merr. 'Polanka'	0.916995	silica gel-dried	Albania, Prokletije mts.; cult. private collection D. Horák (Bystřice pod Hostýnem, Czech Republic)
Saxifraga marginata var. coriophylla (Griseb.) Engl. & Irmsch.	Porphyrion Tausch	Kabschia (Engl.) Rouy & Camus	1.86658	0.00271535	912.758	—		[2x]	[13]	[0.93]	[0.07]	Glycine max Merr. 'Polanka'	0.746632	fresh	cult. BG Brockengarten Harz (Germany) acc. no. 05-B-0235; photographic vouchers (S. Spielau, N. Tkach)
Saxifraga marginata var. coriophylla (Griseb.) Engl. & Irmsch.	Porphyrion Tausch	Kabschia (Engl.) Rouy & Camus	1.91103	0.0101967	934.492	—		[2x]	[13]	[0.96]	[0.07]	Glycine max Merr. 'Polanka'	0.764411	fresh	cult. BG Brockengarten Harz (Germany); photographic vouchers (S. Spielau, N. Tkach)
Saxifraga media Gouan	Porphyrion Tausch	Kabschia (Engl.) Rouy & Camus	2.17268	0.0199589	1062.44	26		2x	13	1.09	0.08	Raphanus sativus L. 'Saxa'	1.95737	silica gel-dried	France, Pyrenées Orientales, Llo; cult. BG Munich (Germany) IPEN: FR-0-M-2005/1264; photographic voucher (N. Tkach)
Saxifraga moncayensis D.A.Webb.	Saxifraga	Saxifraga	1.27373	0.00950329	622.853	ca. 60		?	?	?	?	Solanum lycopersicum L. 'Stupické polní rané'	0.649861	fresh	cult. BG Brockengarten Harz (Germany) acc. no. 02-B-0158; photographic vouchers (S. Spielau, N. Tkach)
Saxifraga moncayensis D.A.Webb.	Saxifraga	Saxifraga	1.27389	0.00309839	622.934	ca. 60		?	?	?	?	Solanum lycopersicum L. 'Stupické polní rané'	0.649946	fresh	cult. BG Brockengarten Harz (Germany) acc. no. 02-B-0158; photographic vouchers (S. Spielau, N. Tkach)
Saxifraga moorcroftiana (Ser.) Wall. ex Sternb.	Ciliatae Haw.	Hirculoideae (Engl. & Irmsch.) Gornall (Clade 3)	7.74	0.0164757	3784.86	16		[4x]	8	[1.94]	[0.24]	Secale cereale L. 'Daňkovské'	0.478073	silica gel-dried	China, Yunnan, Hong Shan Pass, 28°08'37.2"N 99°54'19.3"E, 4506 m, 28.08.2014, J. Ebersbach 14093 (LZ, KUN)
Saxifraga moschata Wulf.	Saxifraga	Saxifraga	1.32775	0.0127704	649.27	22, 24, 26, 28, 52; (intermediates S. exarata-S. moschata with 26, 48)	ca. 26, 26 in: Parker, D.M. 1982. Cytotaxonomic, ecological and conservation studies on the dactyloid saxifrages, (Saxifraga L. section Dactyloides Tausch) of the British Isles. PhD. thesis, University of Liverpool. Available at: https://livrepository.liverpool.ac.uk/3175596/1/345208.pdf.	?	?	?	?	Solanum lycopersicum L. 'Stupické polní rané'	0.677424	fresh	cult. BG Brockengarten Harz (Germany); photographic voucher (S. Spielau)
Saxifraga moschata Wulf.	Saxifraga	Saxifraga	1.38586	0.00963426	677.683	22, 24, 26, 28, 52; (intermediates S. exarata-S. moschata with 26, 48)	ca. 26, 26 in: Parker, D.M. 1982. Cytotaxonomic, ecological and conservation studies on the dactyloid saxifrages, (Saxifraga L. section Dactyloides Tausch) of the British Isles. PhD. thesis, University of Liverpool. Available at: https://livrepository.liverpool.ac.uk/3175596/1/345208.pdf.	?	?	?	?	Solanum lycopersicum L. 'Stupické polní rané'	0.707069	fresh	cult. BG Brockengarten Harz (Germany) acc. no. 05-B-0011; photographic voucher (S. Spielau)
Saxifraga moschata Wulf.	Saxifraga	Saxifraga	1.58966	0.013088	777.342	22, 24, 26, 28, 52; (intermediates S. exarata-S. moschata with 26, 48)	ca. 26, 26 in: Parker, D.M. 1982. Cytotaxonomic, ecological and conservation studies on the dactyloid saxifrages, (Saxifraga L. section Dactyloides Tausch) of the British Isles. PhD. thesis, University of Liverpool. Available at: https://livrepository.liverpool.ac.uk/3175596/1/345208.pdf.	?	?	?	?	Solanum lycopersicum L. 'Stupické polní rané'	0.811049	silica gel-dried	Austria, Styria, Wölz Tauern, 2215 m, 47°16'14.5"N 14°20'30.2"E, 14.06.2018, M. Röser 11348 & N. Tkach (HAL)
Saxifraga moschata Wulf.	Saxifraga	Saxifraga	4.29411	0.041	2099.82	22, 24, 26, 28, 52; (intermediates S. exarata-S. moschata with 26, 48)	ca. 26, 26 in: Parker, D.M. 1982. Cytotaxonomic, ecological and conservation studies on the dactyloid saxifrages, (Saxifraga L. section Dactyloides Tausch) of the British Isles. PhD. thesis, University of Liverpool. Available at: https://livrepository.liverpool.ac.uk/3175596/1/345208.pdf.	?	?	?	?	Pisum sativum L. 'Ctirad'	0.472399	fresh	cult. BG Halle (Germany), alpine garden
Saxifraga mutata subsp. demissa (Schott & Kotschy) D.A.Webb	Porphyrion Tausch	Mutatae (Engl. & Irmsch.) Gornall	3.83997	0.0279432	1877.74	26*, (28*)		[2x]	[13]	[1.92]	[0.15]	Zea mays L. 'CE-777'	0.707177	fresh	cult. BG Brockengarten Harz (Germany) acc. no. 92-B-192A; photographic voucher (N. Tkach)
Saxifraga nana Engl. & Irmsch.	Porphyrion Tausch	Kabschia (Engl.) Rouy & Camus	2.28284	0.0367423	1116.31	—		[2x]	[13]	[1.14]	[0.09]	Zea mays L. 'CE-777'	0.420412	silica gel-dried	China, Sichuan, Songpan, Tianhuashan pass, 32°45'00.69"N 103°43'40.6"E, 4200 m, 06.08.2018, N. Tkach 454, S. Gebauer & A. Favre
Saxifraga nana Engl. & Irmsch.	Porphyrion Tausch	Kabschia (Engl.) Rouy & Camus	2.32021	0.0677639	1134.58	—		[2x]	[13]	[1.16]	[0.09]	Zea mays L. 'CE-777'	0.427296	silica gel-dried	China, Qinghai, Lajishan pass, 36°17'55.75"N 101°35'41.31"E, 3995 m, 06.08.2018, N. Tkach 446
Saxifraga nana Engl. & Irmsch.	Porphyrion Tausch	Kabschia (Engl.) Rouy & Camus	2.32116	0.0516642	1135.05	—		[2x]	[13]	[1.16]	[0.09]	Zea mays L. 'CE-777'	0.42747	silica gel-dried	China, Qinghai, Lajishan pass, 36°17'55.75"N 101°35'41.31"E, 3995 m, 06.08.2018, N. Tkach 447
Saxifraga nevadensis Boiss. & Reut.	Saxifraga	Saxifraga	1.58828	0.0091515	776.667	58 (n=26 in CCDB is wrong: see Favarger C, Küpfer P (1968) Contribution à la cytotaxinomie de la flore alpine des Pyrénées. Collect. Bot. 7(1): 332-352. https://bibdigital.rjb.csic.es/viewer/11986/?offset=#page=347&viewer=picture&o=bookmark&n=0&q=)		?	?	?	?	Glycine max Merr. 'Polanka'	0.63531	fresh	cult. BG Brockengarten Harz (Germany) acc. no. 04-B-0126; photographic vouchers (S. Spielau, N. Tkach)
Saxifraga omphalodifolia Hand.-Mazz.	Ciliatae Haw.	Hirculoideae (Engl. & Irmsch.) Gornall (Clade 3)	6.8607	0.0118939	3354.88	—		[4x]	[8]	[1.72]	[0.21]	Secale cereale L. 'Daňkovské'	0.423761	silica gel-dried	China, Yunnan, 5 km SW of Yubeng Village, 28°22'15.3"N 98°45'55.6"E, 3359 m, 02.098.2014, J. Ebersbach 14110 (LZ, KUN)
Saxifraga oppositifolia L.	Porphyrion Tausch	Oppositifoliae Hayek	3.00256	0.0297843	1468.25	26, 52	28 in: Funamoto, T. 2010. Somatic chromosomes of ten species of Saxifraga L. (Saxifragaceae) in Asian continent, Russia and Mongolia.Chromosome Botany 5(1): 5-13. hts://doi.org/10.3199/iscb.5.5	2x	13	1.5	0.12	Zea mays L. 'CE-777'	0.552958	fresh	cult. BG Brockengarten Harz (Germany); photographic voucher (S. Spielau)
Saxifraga oppositifolia L.	Porphyrion Tausch	Oppositifoliae Hayek	3.40927	0.14026	1667.13	26, 52	28 in: Funamoto, T. 2010. Somatic chromosomes of ten species of Saxifraga L. (Saxifragaceae) in Asian continent, Russia and Mongolia.Chromosome Botany 5(1): 5-13. hts://doi.org/10.3199/iscb.5.5	2x	13	1.7	0.13	Zea mays L. 'CE-777'	0.627857	silica gel-dried	Switzerland, Valais, Mauvoisin, A. Favre (LZ)
Saxifraga oppositifolia subsp. latina (A.Terracc.) Arrigoni	Porphyrion Tausch	Oppositifoliae Hayek	3.26009	0.0287683	1594.19	26*, 52*	28 in: Funamoto, T. 2010. Somatic chromosomes of ten species of Saxifraga L. (Saxifragaceae) in Asian continent, Russia and Mongolia.Chromosome Botany 5(1): 5-13. hts://doi.org/10.3199/iscb.5.5	[2x]	[13]	[1.63]	[0.13]	Zea mays L. 'CE-777'	0.600385	fresh	cult. BG Brockengarten Harz (Germany); photographic vouchers (S. Spielau, N. Tkach)
Saxifraga oreophila Franch.	Ciliatae Haw.	Clade 1	6.76823	0.0285829	3309.66	—		[4x]	[8]	[1.69]	[0.21]	Secale cereale L. 'Daňkovské'	0.41805	silica gel-dried	China, Yunnan, Lijiang, 27°09.257'N 100°15.732'E, 2920 m, 18.08.2011, A. Favre & S. Matuszak 117 (FR, KUN)
Saxifraga paniculata Mill.	Ligulatae Haw.		3.13813	0.0196889	1534.55	28		2x	14	1.57	0.11	Zea mays L. 'CE-777'	0.577925	fresh	cult. BG Brockengarten Harz (Germany); photographic voucher (S. Spielau)
Saxifraga paniculata Mill.	Ligulatae Haw.		3.16	0.006	1545.24	28		2x	14	1.58	0.11	Zea mays L. 'CE-777'	0.581952	fresh	cult. BG Brockengarten Harz (Germany); photographic vouchers (S. Spielau, N. Tkach)
Saxifraga paniculata Mill.	Ligulatae Haw.		3.16545	0.008	1547.91	28		2x	14	1.58273	0.113052	Zea mays L. 'CE-777'	0.582957	fresh	cult. BG Halle (Germany), alpine garden
Saxifraga paniculata Mill.	Ligulatae Haw.		3.26009	0.0159631	1594.19	28		2x	14	1.63	0.12	Zea mays L. 'CE-777'	0.600385	fresh	cult. BG Brockengarten Harz (Germany); photographic vouchers (S. Spielau, N. Tkach)
Saxifraga paniculata Mill.	Ligulatae Haw.		3.13495	0.0156875	1532.99	28		2x	14	1.57	0.11	Zea mays L. 'CE-777'	0.577339	fresh	cult. BG Brockengarten Harz (Germany) acc. no. 97-B-1824; photographic vouchers (S. Spielau, N. Tkach)
Saxifraga paniculata Mill. x valdensis DC.	Ligulatae Haw.		3.23049	0.0222558	1579.71	—		[2x]	[14]	[1.62]	[0.12]	Zea mays L. 'CE-777'	0.594933	fresh	cult. BG Brockengarten Harz (Germany); photographic vouchers (S. Spielau, N. Tkach)
Saxifraga paniculata cv. 'Baldensis'	Ligulatae Haw.		3.24803	0.0076875	1588.29	28*		[2x]	[14]	[1.62]	[0.12]	Zea mays L. 'CE-777'	0.598164	fresh	cult. BG Brockengarten Harz (Germany) acc. no. 05-B-0015; photographic voucher (S. Spielau)
Saxifraga paradoxa Sternb.	Saxifraga	Arachnoideae (Engl. & Irmsch.) Tkach, Röser & M.H.Hoffm.	0.921299	0.0382628	450.515	64		6x	11	0.15355	0.0143953	Raphanus sativus L. 'Saxa'	0.829999	silica gel-dried	Austria, Styria, Deutschlandsberg, Laßnitz Gorge, 484 m, 46°48'50.0"N 15°11'50.5"E, 18.06.2018. M. Röser 11358 & N. Tkach (HAL)
Saxifraga pedemontana subsp. cervicornis (Viv.) Arcang.	Saxifraga	Saxifraga	1.8753	0.00823729	917.022	(26), 42, 44	52 in: Parker, D.M. 1982. Cytotaxonomic, ecological and conservation studies on the dactyloid saxifrages, (Saxifraga L. section Dactyloides Tausch) of the British Isles. PhD. thesis, University of Liverpool. Available at: https://livrepository.liverpool.ac.uk/3175596/1/345208.pdf.	?	?	?	?	Glycine max Merr. 'Polanka'	0.750121	fresh	cult. BG Brockengarten Harz (Germany) acc. no. 05-B-0078; photographic vouchers (S. Spielau, N. Tkach)
Saxifraga petraea L.	Saxifraga	Arachnoideae (Engl. & Irmsch.) Tkach, Röser & M.H.Hoffm.	0.971745	0.00569971	475.183	64		6x	11	0.161957	0.0147234	Raphanus sativus L. 'Saxa'	0.875446	fresh	cult. alpine garden of M. Rothmeier (Büchenbach, Germany); plants grown from seed from the Alps; photographic voucher (N. Tkach)
Saxifraga poluniniana Harry Sm.	Porphyrion Tausch	Kabschia (Engl.) Rouy & Camus	2.30488	0.0629515	1127.08	—		[2x]	[13]	[1.15]	[0.09]	Zea mays L. 'CE-777'	0.424471	silica gel-dried	origin unknown, sample obtained from J. Ebersbach (Leipzig)
Saxifraga pulchra Engl. & Irmsch.	Porphyrion Tausch	Kabschia (Engl.) Rouy & Camus	2.6277	0.114643	1284.95	—		[2x]	[13]	[1.32]	[0.10]	Zea mays L. 'CE-777'	0.483923	silica gel-dried	China, Yunnan, Dali, Cangshan, 25°40.644'N 100°06.953'E, 3290 m, 09.08.2011, A. Favre & S. Matuszak 67 (FR, KUN)
Saxifraga ramsarica Jamzad	Porphyrion Tausch	Kabschia (Engl.) Rouy & Camus	1.55483	0.0241875	760.312	—		[2x]	[13]	[0.78]	[0.06]	Solanum lycopersicum L. 'Stupické polní rané'	0.793281	silica gel-dried	Iran, Mazanderan, Javaherden, Samamous Mt., 3500-3710 m, 02.08.2015, Amini Rad & Bahramishad (IRAN69356, HAL)
Saxifraga rebunshirensis (Engl. & Irmsch.) Sipliv.	Bronchiales DeChaine		5.28449	0.00763664	2584.12	—	48 in: Tamura S, Fukuda T, Pimenova EA, Petrunenko EA, Krestov PV, Bondarchuk SN, Chernyagina OA, Suyama Y, Tsunamoto Y, Matsuo A, Tsuboi H, Takahashi H, Sato K, Nishikawa Y, Shimamura T, Fujita H, Nakamura K (2018) Molecular and cytological evidences denied the immediate-hybrid hypothesis for Saxifraga yuparensis (sect. Bronchiales, Saxifragaceae) endemic to Mt. Yubari in Hokkaido, northern Japa…	4x	13	1.32	0.1	Pisum sativum L. 'Ctirad'	0.581352	silica gel-dried	cult. BG Tübingen (Germany) acc. no. 691; photographic voucher (N. Tkach)
Saxifraga retusa subsp. augustata (Vacc.) P.Fourn.	Porphyrion Tausch	Oppositifoliae Hayek	2.5	0	1222.5	26		2x	13	1.25	0.1	Glycine max Merr. 'Polanka'	1	fresh	cult. BG Brockengarten Harz (Germany) acc. no. 11-B-0145; photographic vouchers (S. Spielau, N. Tkach)
Saxifraga retusa Goun subsp. retusa	Porphyrion Tausch	Oppositifoliae Hayek	2.5	0	1222.5	26*, 30*		[2x]	[13]	[1.25]	[0.10]	Glycine max Merr. 'Polanka'	1	fresh	cult. BG Brockengarten Harz (Germany) acc. no. 21-B-0120; photographic vouchers (S. Spielau, N. Tkach)
Saxifraga rosacea Moench	Saxifraga	Saxifraga	3.12	0.0289301	1525.68	32, 50, 52, 56, 64		6x(?)	N/A	0.52(?)	N/A	Zea mays L. 'CE-777'	0.574586	fresh	Czech Republic, Southern Moravia, Oslavany, 2024, D. Horák OSL23-5; cult. BG Halle (Germany)
Saxifraga rosacea Moench	Saxifraga	Saxifraga	4.0719	0.0151262	1991.16	32, 50, 52, 56, 64		6x(?)	N/A	0.68(?)	N/A	Zea mays L. 'CE-777'	0.74989	fresh	Germany, Bavaria, Hohenstadt (Pommelsbrunn), 49°30'53.8"N 11°29'03.1"E, 442 m, 07.05.2024, N. Tkach 452, D. Horák & T. Hahnová (HAL)
Saxifraga rosacea Moench	Saxifraga	Saxifraga	4.34808	0.0367106	2126.21	32, 50, 52, 56, 64		6x(?)	N/A	0.73(?)	N/A	Zea mays L. 'CE-777'	0.800751	fresh	Germany, Harz Mountain, Treseburg, 6.51.51°43'05.9"N 10°58'14.4"E, 06.05.2024, N. Tkach 741, D. Horák & T. Hahnová (HAL)
Saxifraga rotundifolia L.	Cotylea Tausch		3.3597	0.014	1642.89	22		2x	11	1.68	0.15	Zea mays L. 'CE-777'	0.618729	fresh	cult. BG Halle (Germany), alpine garden
Saxifraga rotundifolia L.	Cotylea Tausch		3.67227	0.166921	1795.74	22		2x	11	1.83613	0.166921	Zea mays L. 'CE-777'	0.676292	silica gel-dried	Georgia, Caucasus, Upper Svaneti, Becho, 43°4'13.945"N 42°33'52.060"E, 2422 m, 16.07.2025, N. Tkach 882 (HAL)
Saxifraga rotundifolia L.	Cotylea Tausch		4.62027	0.0154285	2259.31	22		3x ?	11	1.54 ?	0.14 ?	Pisum sativum L. 'Ctirad'	0.508281	silica gel-dried	Switzerland, Valais, Crettaz di Trétien, 46°06'18.63"N 6°59'26.12"E, 20.06.2013, A. Favre 13027 (LZ)
Saxifraga rotundifolia var. coriifolia Sommier & Levier	Cotylea Tausch		3.38976	0.00534823	1657.59	22*		2x	11	1.69	0.15	Zea mays L. 'CE-777'	0.624266	fresh	cult. BG Brockengarten Harz (Germany) acc. no. 05-B-0111; photographic vouchers (S. Spielau, N. Tkach)
Saxifraga rufescens Balf.f.	Irregulares Haw.		12.3612	0.028	6044.65	—		?	?	?	?	Secale cereale L. 'Daňkovské'	0.763511	silica gel-dried	China, Yunnan, above Bendiwan, 27°14.528'N 100°07.243'E, 2955 m, 07.09.2012, A. Favre 1212 (FR, KUN)
Saxifraga sancta Griseb.	Porphyrion Tausch	Kabschia (Engl.) Rouy & Camus	2.21627	0.020746	1083.76	—		[2x]	[13]	[1.11]	[0.10]	Glycine max Merr. 'Polanka'	0.886508	silica gel-dried	Turkey, Kaz Dag; cult. private collection D. Horák (Bystřice pod Hostýnem, Czech Republic)
Saxifraga sancta Griseb.	Porphyrion Tausch	Kabschia (Engl.) Rouy & Camus	2.23424	0.0192606	1092.54	—		[2x]	[13]	[1.12]	[0.10]	Glycine max Merr. 'Polanka'	0.893696	silica gel-dried	NE Greece, Mt Pangeon, 1750 m, 11.09.2009, J. Hemmerling, S. Jeßen & L. Lehmann; cult. Arktisch-Alpiner Garten Chemnitz (Germany) acc. no. AC-2079
Saxifraga scardica Griseb.	Porphyrion Tausch	Kabschia (Engl.) Rouy & Camus	1.90157	0.00335153	929.866	26		2x	13	0.950783	0.0731372	Glycine max Merr. 'Polanka'	0.760626	fresh	cult. BG Brockengarten Harz (Germany); photographic voucher (S. Spielau)
Saxifraga scardica Griseb.	Porphyrion Tausch	Kabschia (Engl.) Rouy & Camus	2.19909	0.0583124	1075.35	26		2x	13	1.09954	0.0845802	Glycine max Merr. 'Polanka'	0.879635	silica gel-dried	Greece, Peloponnese; cult. private collection D. Horák (Bystřice pod Hostýnem, Czech Republic)
Saxifraga scardica Griseb.	Porphyrion Tausch	Kabschia (Engl.) Rouy & Camus	2.33352	0.0275615	1141.09	26		2x	13	1.16676	0.0897509	Glycine max Merr. 'Polanka'	0.93341	silica gel-dried	North Macedonia, Galicica mts; cult. private collection D. Horák (Bystřice pod Hostýnem, Czech Republic)
Saxifraga cf. scardica Griseb.	Porphyrion Tausch	Kabschia (Engl.) Rouy & Camus	1.737	0.0133288	849.392	26		2x	13	0.868499	0.0668076	Glycine max Merr. 'Polanka'	0.694799	fresh	SW North Macedonia, Galicia, 2300m; cult. Arktisch-Alpiner Garten Chemnitz (Germany) acc. no. AC-2080; photographic voucher (N. Tkach)
Saxifraga cf. scardica Griseb.	Porphyrion Tausch	Kabschia (Engl.) Rouy & Camus	1.89365	0.0107848	925.993	26		2x	13	0.946823	0.0728325	Glycine max Merr. 'Polanka'	0.757458	fresh	cult. BG Brockengarten Harz (Germany) acc. no. 95-B1188A; photographic vouchers (S. Spielau, N. Tkach)
Saxifraga scardica Griseb. subsp. scardica	Porphyrion Tausch	Kabschia (Engl.) Rouy & Camus	1.88031	0.00512086	919.471	26		2x	13	0.94	0.07	Glycine max Merr. 'Polanka'	0.752124	fresh	cult. BG Brockengarten Harz (Germany) acc. no. 20-B-0034; photographic vouchers (S. Spielau, N. Tkach)
Saxifraga scardica Griseb. subsp. scardica	Porphyrion Tausch	Kabschia (Engl.) Rouy & Camus	1.88265	0.0181815	920.615	26		2x	13	0.94	0.07	Glycine max Merr. 'Polanka'	0.75306	fresh	cult. BG Brockengarten Harz (Germany) acc. no. 17-B-0055; photographic vouchers (S. Spielau, N. Tkach)
Saxifraga scleropoda Sommier & Levier	Porphyrion Tausch	Kabschia (Engl.) Rouy & Camus	2.06209	0.0410707	1008.36	—		[2x]	[13]	[1.03]	[0.08]	Glycine max Merr. 'Polanka'	0.824838	silica gel-dried	Russia, Caucasus, Elbrus; cult. private collection D. Horák (Bystřice pod Hostýnem, Czech Republic)
Saxifraga cf. scleropoda Sommier & Levier	Porphyrion Tausch	Kabschia (Engl.) Rouy & Camus	1.54283	0.0120233	754.446	—		[2x]	[13]	[0.77]	[0.06]	Glycine max Merr. 'Polanka'	0.617134	fresh	cult. BG Brockengarten Harz (Germany); photographic voucher (N. Tkach)
Saxifraga cf. scleropoda Sommier & Levier	Porphyrion Tausch	Kabschia (Engl.) Rouy & Camus	1.65552	0.00304278	809.549	—		[2x]	[13]	[0.83]	[0.06]	Glycine max Merr. 'Polanka'	0.662207	fresh	cult. BG Brockengarten Harz (Germany); photographic voucher (S. Spielau)
Saxifraga sediformis Engl. & Irmsch.	Ciliatae Haw.	Clade 2	5.87296	0.00236538	2871.88	—		[4x]	[8]	[1.47]	[0.18]	Pisum sativum L. 'Ctirad'	0.64609	silica gel-dried	China, Yunnan, Bashuitai, 27°31.036'N 099°59.846'E, 3617 m, 20.08.2011, A. Favre & S. Matuszak 139 (FR, KUN)
Saxifraga sempervivum K.Koch	Porphyrion Tausch	Kabschia (Engl.) Rouy & Camus	2.11212	0.0226118	1032.83	(12)		[2x]	[13]	[1.06]	[0.08]	Glycine max Merr. 'Polanka'	0.844848	fresh	Bulgaria, Pirin mts, Orelyak, 41°34′13.99″N 23°36′46.38″E, J. Jurasek; cult. private collection D. Horák (Bystřice pod Hostýnem, Czech Republic)
Saxifraga sempervivum K.Koch	Porphyrion Tausch	Kabschia (Engl.) Rouy & Camus	2.11212	0.00824267	1032.83	(12)		[2x]	[13]	[1.06]	[0.08]	Glycine max Merr. 'Polanka'	0.844848	fresh	Bulgaria, Ali Botush reserve (Slavyanka) ca. 41°22′37″N 23°37′14″E; cult. private collection D. Horák (Bystřice pod Hostýnem, Czech Republic)
Saxifraga sempervivum K.Koch	Porphyrion Tausch	Kabschia (Engl.) Rouy & Camus	2.11212	0.0120632	1032.83	(12)		[2x]	[13]	[1.06]	[0.08]	Glycine max Merr. 'Polanka'	0.844848	fresh	Turkey, Ulu Dag, 40°4'13.906"N, 29°13'19.235"E, V. Stanek; cult. private collection D. Horák (Bystřice pod Hostýnem, Czech Republic)
Saxifraga sempervivum K.Koch	Porphyrion Tausch	Kabschia (Engl.) Rouy & Camus	2.11212	0.0400101	1032.83	(12)		[2x]	[13]	[1.06]	[0.08]	Zea mays L. 'CE-777'	0.388972	silica gel-dried	Central North Macedonia, Karadsitsa, above Patiska Reka, 1760 m, 14.09.2005, S. Jeßen & L. Lehmann; cult. Arktisch-Alpiner Garten Chemnitz (Germany) acc. no. AC-2081
Saxifraga sibirica L.	Mesogyne Sternb.		0.988687	0.0262035	483.468	16, 20, 26, 28, 32, 48, 60	48 in: Funamoto, T. 2010. Somatic chromosomes of ten species of Saxifraga L. (Saxifragaceae) in Asian continent, Russia and Mongolia.Chromosome Botany 5(1): 5-13. hts://doi.org/10.3199/iscb.5.5; Note: 2n=16 most frequent in Ural Mts. according to Kapralov MV, Gabrielsen TM, Sarapultsev IE, Brochmann C (2006) Genetic enrichment of the arctic clonal plant Saxifraga cernua at its southern periphery …	2x	13 ?	0.5	0.04 ?	Raphanus sativus L. 'Saxa'	0.890709	silica gel-dried	Georgia, Caucasus, Upper Svaneti, 43°7'13.191"N 42°35'27.812"E, 2164 m, 17.07.2025, N. Tkach 888 (HAL)
Saxifraga sibirica L.	Mesogyne Sternb.		1.04206	0.00757858	509.567	16, 20, 26, 28, 32, 48, 60	48 in: Funamoto, T. 2010. Somatic chromosomes of ten species of Saxifraga L. (Saxifragaceae) in Asian continent, Russia and Mongolia.Chromosome Botany 5(1): 5-13. hts://doi.org/10.3199/iscb.5.5; Note: 2n=16 most frequent in Ural Mts. according to Kapralov MV, Gabrielsen TM, Sarapultsev IE, Brochmann C (2006) Genetic enrichment of the arctic clonal plant Saxifraga cernua at its southern periphery …	2x	13 ?	0.52	0.04 ?	Raphanus sativus L. 'Saxa'	0.938793	silica gel-dried	Georgia, Caucasus, Upper Svaneti, 43°7'13.191"N 42°35'27.812"E, 2164 m, 17.07.2025, N. Tkach 887 (HAL)
Saxifraga sp.	Porphyrion Tausch	Kabschia (Engl.) Rouy & Camus	3.14733	0.00883815	1539.04	—		[2x]	[13]	[1.58]	[0.11]	Zea mays L. 'CE-777'	0.579618	fresh	cult. BG Brockengarten Harz (Germany) acc. no. 97-B-1833; photographic voucher (S. Spielau)
Saxifraga sp.	Porphyrion Tausch	Kabschia (Engl.) Rouy & Camus	3.70216	0.00858328	1810.36	—		[2x]	[13]	[1.85]	[0.13]	Zea mays L. 'CE-777'	0.681798	fresh	cult. BG Brockengarten Harz (Germany); photographic vouchers (S. Spielau, N. Tkach)
Saxifraga sp.	Porphyrion Tausch	Kabschia (Engl.) Rouy & Camus	1.56	0.022	762.84	—		[2x]	[13]	[0.78]	[0.10]	Solanum lycopersicum L. 'Stupické polní rané'	0.795918	fresh	cult. BG Brockengarten Harz (Germany); photographic vouchers (S. Spielau, N. Tkach)
Saxifraga sp.	Porphyrion Tausch	Kabschia (Engl.) Rouy & Camus	1.84	0.00616367	899.76	—		[2x]	[13]	[0.92]	[0.07]	Glycine max Merr. 'Polanka'	0.736	fresh	cult. BG Brockengarten Harz (Germany); photographic voucher (N. Tkach)
Saxifraga sp.	Porphyrion Tausch	Kabschia (Engl.) Rouy & Camus	1.87906	0.0210313	918.859	—		[2x]	[13]	[0.94]	[0.07]	Glycine max Merr. 'Polanka'	0.751623	fresh	cult. BG Brockengarten Harz (Germany); photographic voucher (N. Tkach)
Saxifraga spinulosa Adams	Bronchiales DeChaine		4.35622	0.0114496	2130.19	ca. 80. Note: The chromosome number of 2n=ca. 80 based on Sokolovskaja 1963 actually refers to S. funstonii according Sokolovskaja et al. 1989. Sokolovskaya AP, Probatova NS, Rudyka EG (1989) Chromosome numbers in some species of the flora of the Soviet far East from the families Actinidiaceae, Aristolochiaceae, Fabaceae, Ranunculaceae, Saxifragaceae. Bot Zhurn (Moscow & Leningrad) 74:268–271. SO…	50 in: Sokolovskaya 1982 Sokolovskaya A.P. Poliploidija sredi tsvetkovyh rastenij raznyh landshaftov SSSR [Polyploidy among flowering plants of different landscapes in the USSR] // Tr. Leningr. ob-va estestvoispyt. [Proc. Leningrad. Soc. natural scientists], 1982. – Vol. 75. Iss. 3. – P. 1–128 [in Russian]. (Соколовская А.П. Полиплоидия среди цветковых растений разных ландшафтов СССР // Тр. Ленин…	4x	13	1.09	0.08	Zea mays L. 'CE-777'	0.80225	fresh	cult. BG Brockengarten Harz (Germany) acc. no. 02-B-0035; photographic vouchers (S. Spielau, N. Tkach)
Saxifraga spruneri Boiss.	Porphyrion Tausch	Kabschia (Engl.) Rouy & Camus	1.50111	0.0105929	734.042	26, (28)		2x	13	0.750554	0.0577349	Solanum lycopersicum L. 'Stupické polní rané'	0.765871	silica gel-dried	cult. BG Brockengarten Harz (Germany) acc. no. 94-B-917A
Saxifraga spruneri Boiss.	Porphyrion Tausch	Kabschia (Engl.) Rouy & Camus	1.51	0.018001	738.39	26, (28)		2x	13	0.76	0.06	Glycine max Merr. 'Polanka'	0.604	fresh	cult. BG Brockengarten Harz (Germany) acc. no. 94-B-917A; photographic voucher (N. Tkach)
Saxifraga squarrosa Sieber	Porphyrion Tausch	Squarrosae (Engl. & Irmsch.) Tkach, Röser & M.H.Hoffm.	3.27727	0.0239697	1602.59	26		2x	13	1.63864	0.126049	Zea mays L. 'CE-777'	0.603549	fresh	cult. BG Brockengarten Harz (Germany) acc. no. 99-B-2065; photographic vouchers (S. Spielau, N. Tkach)
Saxifraga stolonifera Curtis	Irregulares Haw.		2.15462	0.00288978	1053.61	30, 32, 36, 54, 56		?	9 ?	?	?	Glycine max Merr. 'Polanka'	0.861848	fresh	cult. BG Halle (Germany), saxifrage bed, obtained in 2023 from BG Berlin-Dahlem (Germany)
Saxifraga stolonifera Curtis	Irregulares Haw.		2.58118	0.0190296	1262.2	30, 32, 36, 54, 56		?	9 ?	?	?	Zea mays L. 'CE-777'	0.475355	silica gel-dried	cult. BG Tübingen (Germany) acc. no. 5064; photographic voucher (N. Tkach)
Saxifraga stribrnyi (Velen.) Podp.	Porphyrion Tausch	Kabschia (Engl.) Rouy & Camus	2.40607	0.0270021	1176.57	26		2x	13	1.20304	0.0925412	Zea mays L. 'CE-777'	0.443107	silica gel-dried	Bulgaria, Rhodope Mountains, K. Wienke; cult. Arktisch-Alpiner Garten Chemnitz (Germany) acc. no. AC-1388; photographic voucher (N. Tkach)
Saxifraga stribrnyi (Velen.) Podp.	Porphyrion Tausch	Kabschia (Engl.) Rouy & Camus	2.66488	0.0167527	1303.13	26		2x	13	1.33244	0.102495	Zea mays L. 'CE-777'	0.49077	silica gel-dried	Bulgaria, Rodopi, Backovo lake; cult. private collection D. Horák (Bystřice pod Hostýnem, Czech Republic)
Saxifraga strigosa Wall. ex Ser.	Ciliatae Haw.	Clade 1	6.91862	0.444293	3383.21	16, 32		[4x]	8	[1.15]	[0.22]	Secale cereale L. 'Daňkovské'	0.427339	silica gel-dried	China, Yunnan, Tengchong County, Jietou, 25°27.199'N 098°44.731'E, 2704 m, 27.07.2013, A. Favre & S. Matuszak 26 (FR, KUN)
Saxifraga strigosa Wall. ex Ser.	Ciliatae Haw.	Clade 1	6.99357	0.0632566	3419.85	16, 32		[4x]	8	[1.17]	[0.22]	Secale cereale L. 'Daňkovské'	0.431968	silica gel-dried	China, Yunnan, Lijiang, 27°07.341'N 100°14.038'E, 3296 m, 19.08.2011, A. Favre & S. Matuszak 129 (FR, KUN)
Saxifraga strigosa Wall. ex Ser.	Ciliatae Haw.	Clade 1	7.52577	0.0152446	3680.1	16, 32		[4x]	8	[1.88]	[0.24]	Secale cereale L. 'Daňkovské'	0.46484	silica gel-dried	China, Sichuan, Luoji Mountain Scenic Area, 27.09.2011, A. Favre 324 (FR, KUN)
Saxifraga subverticillata Boiss.	Porphyrion Tausch	Kabschia (Engl.) Rouy & Camus	1.96319	0.0169093	960	—		[2x]	[13]	[0.98]	[0.08]	Raphanus sativus L. 'Saxa'	1.76864	silica gel-dried	Georgia, Svaneti, Ushguli, 43°02'24" N 42°23'06" E, 1340 m, 09.08.2009, A. Gröger et al. 164-102; cult. BG Munich (Germany) IPEN: GE-0-M-2009/2412; photographic voucher (N. Tkach)
Saxifraga tenella Wulfen	Saxifraga	Arachnoideae (Engl. & Irmsch.) Tkach, Röser & M.H.Hoffm.	0.881385	0.00082413	430.997	64, 66		6x	11	0.15	0.01	Raphanus sativus L. 'Saxa'	0.79404	fresh	cult. BG Brockengarten Harz (Germany) acc. no. 91-B-34A; photographic vouchers (S. Spielau, N. Tkach)
Saxifraga tenella Wulfen	Saxifraga	Arachnoideae (Engl. & Irmsch.) Tkach, Röser & M.H.Hoffm.	0.908895	0.00311516	444.45	64, 66		6x	11	0.151483	0.0137711	Raphanus sativus L. 'Saxa'	0.818825	fresh	cult. BG Brockengarten Harz (Germany) acc. no. 91-B-34A; photographic vouchers (S. Spielau, N. Tkach)
Saxifraga tombeanensis Boiss. ex Engl.	Porphyrion Tausch	Kabschia (Engl.) Rouy & Camus	2.15395	0.0263671	1053.28	26		2x	13	1.08	0.08	Glycine max Merr. 'Polanka'	0.861579	fresh	cult. BG Brockengarten Harz (Germany) acc. no. 94-B-772A; photographic voucher (N. Tkach)
Saxifraga tombeanensis Boiss. ex Engl.	Porphyrion Tausch	Kabschia (Engl.) Rouy & Camus	2.18357	0.00439074	1067.76	26		2x	13	1.09178	0.0839833	Raphanus sativus L. 'Saxa'	1.96718	silica gel-dried	Italy, Mte. Tofino, Valle di Ledro; cult. Arktisch-Alpiner Garten Chemnitz (Germany) acc. no. AC-1883
Saxifraga tridactylites L.	Saxifraga	Tridactylites (Haw.) Gornall	1.35753	0.0131334	663.83	22		2x	11	0.678763	0.0617057	Solanum lycopersicum L. 'Stupické polní rané'	0.692615	silica gel-dried	Germany, Saxony-Anhalt, Weischütz (Unstrut), 51°13'40.7"E 11°42'26.5"E, 09.04.2017. M. Röser 11294 & N. Tkach (HAL)
Saxifraga trifurcata Schrad.	Saxifraga	Saxifraga	3.88	0.025	1897.32	(28), ca. 38, 44	28 in: Parker, D.M. 1982. Cytotaxonomic, ecological and conservation studies on the dactyloid saxifrages, (Saxifraga L. section Dactyloides Tausch) of the British Isles. PhD. thesis, University of Liverpool. Available at: https://livrepository.liverpool.ac.uk/3175596/1/345208.pdf.	?	?	?	?	Zea mays L. 'CE-777'	0.714549	fresh	cult. BG Halle (Germany), alpine garden
Saxifraga tsangchanensis Franch.	Ciliatae Haw.	Hirculoideae (Engl. & Irmsch.) Gornall (Clade 3)	8.39272	0.0675271	4104.04	—		[6x]	[8]	[1.40]	[0.17]	Secale cereale L. 'Daňkovské'	0.518389	silica gel-dried	China, Yunnan, Yubeng Village, 28°23'53.5" N 098°44'54.4" E, 3892 m, 01.09.2014, J. Ebersbach 14107 (LZ, KUN)
Saxifraga umbrosa L.	Gymnopera D.Don		3.43187	0.0169366	1678.19	28		2x	14	1.72	0.12	Zea mays L. 'CE-777'	0.63202	fresh	cult. BG Brockengarten Harz (Germany); photographic vouchers (S. Spielau, N. Tkach)
Saxifraga umbrosa L.	Gymnopera D.Don		3.44924	0.0110292	1686.68	28		2x	14	1.73	0.12	Zea mays L. 'CE-777'	0.635219	fresh	cult. BG Brockengarten Harz (Germany); photographic voucher (N. Tkach)
Saxifraga umbrosa L.	Gymnopera D.Don		3.47656	0.00991893	1700.04	28		2x	14	1.74	0.12	Zea mays L. 'CE-777'	0.640251	fresh	cult. BG Brockengarten Harz (Germany); photographic voucher (N. Tkach)
Saxifraga umbrosa L.	Gymnopera D.Don		3.42414	0.0157573	1674.4	28		2x	14	1.71	0.12	Zea mays L. 'CE-777'	0.630596	fresh	cult. BG Brockengarten Harz (Germany); photographic voucher (S. Spielau)
Saxifraga unguipetala Engl. & Irmsch.	Porphyrion Tausch	Kabschia (Engl.) Rouy & Camus	2.04045	0.0256497	997.778	—		[2x]	[13]	[1.02]	[0.08]	Zea mays L. 'CE-777'	0.375773	fresh	cult. BG Brockengarten Harz (Germany) acc. no. 97-B-1815; photographic vouchers (S. Spielau, N. Tkach)
Saxifraga unifoveolata Sipliv.	Porphyrion Tausch	Kabschia (Engl.) Rouy & Camus	2.01222	0.0173903	983.978	—		[2x]	[13]	[1.01]	[0.08]	Glycine max Merr. 'Polanka'	0.80489	silica gel-dried	Russia, Caucasus, Mt. Fisht; cult. private collection D. Horák (Bystřice pod Hostýnem, Czech Republic)
Saxifraga cf. unifoveolata Sipliv.	Porphyrion Tausch	Kabschia (Engl.) Rouy & Camus	1.64381	0.00969735	803.823	—		[2x]	[13]	[0.82]	[0.06]	Glycine max Merr. 'Polanka'	0.657524	fresh	cult. BG Brockengarten Harz (Germany); photographic voucher (N. Tkach)
Saxifraga cf. unifoveolata Sipliv.	Porphyrion Tausch	Kabschia (Engl.) Rouy & Camus	1.67983	0.00564864	821.435	—		[2x]	[13]	[0.84]	[0.06]	Glycine max Merr. 'Polanka'	0.671931	fresh	cult. BG Brockengarten Harz (Germany); photographic vouchers (S. Spielau, N. Tkach)
Saxifraga vandellii Sternb.	Porphyrion Tausch	Kabschia (Engl.) Rouy & Camus	2.37044	0.0481616	1159.14	26		2x	13	1.18522	0.0911707	Glycine max Merr. 'Polanka'	0.948175	fresh	cult. BG Brockengarten Harz (Germany) acc. no. 07-B-0031; photographic vouchers (S. Spielau, N. Tkach)
Saxifraga vayredana Luizet	Saxifraga	Saxifraga	1.28	0.00960479	625.92	60, 62, ca. 64	ca. 64 in: Parker, D.M. 1982. Cytotaxonomic, ecological and conservation studies on the dactyloid saxifrages, (Saxifraga L. section Dactyloides Tausch) of the British Isles. PhD. thesis, University of Liverpool. Available at: https://livrepository.liverpool.ac.uk/3175596/1/345208.pdf.	[6x]	[11]	[0.21]	[0.02]	Solanum lycopersicum L. 'Stupické polní rané'	0.653061	fresh	cult. BG Brockengarten Harz (Germany) acc. no. 18-B-0134; photographic vouchers (S. Spielau, N. Tkach)
Saxifraga vayredana Luizet	Saxifraga	Saxifraga	1.42172	0.00710912	695.219	60, 62, ca. 64	ca. 64 in: Parker, D.M. 1982. Cytotaxonomic, ecological and conservation studies on the dactyloid saxifrages, (Saxifraga L. section Dactyloides Tausch) of the British Isles. PhD. thesis, University of Liverpool. Available at: https://livrepository.liverpool.ac.uk/3175596/1/345208.pdf.	[6x]	[11]	[0.24]	[0.02]	Solanum lycopersicum L. 'Stupické polní rané'	0.725366	silica gel-dried	cult. BG Munich (Germany) IPEN: XX-0-MG/0019; photographic voucher (N. Tkach)
Saxifraga veitchiana Balf.f.	Irregulares Haw.		2.26977	0.00740818	1109.92	—		?	[9 ?]	?	?	Glycine max Merr. 'Polanka'	0.907909	fresh	cult. Arktisch-Alpiner Garten Chemnitz (Germany) acc. no. AC-1366
Chrysosplenium alternifolium L.			1.93941	0.0176033	948.374	18, 24, 36, 48, 72, 96		?	?	?	?	Zea mays L. 'CE-777'	0.357167	silica gel-dried	Germany, Saxony-Anhalt, Goldschau, 51°3'17.5"N 11°54'19.6"E, 216 m, 07.05.2023, N. Tkach 715 (HAL)
Chrysosplenium griffithii Hook.f. & Thomson			7.50282	0.0367617	3668.88	18, 36		[4x]	9	[1.88]	[0.21]	Secale cereale L. 'Daňkovské'	0.463423	silica gel-dried	China, Sichuan, Songpan, Monigou Mountains, 32°39'54.15"N 103°30'48.05"E, 3330 m, 10.08.2018, N. Tkach 460, S. Gebauer & A. Favre (HAL)
Heuchera pubescens Pursh			1.6836	0.0233714	823.282	14		2x	7	0.84	0.06	Glycine max Merr. 'Polanka'	0.673441	silica gel-dried	USA, Virginia, Appalachian Highlands, Cowpasture River, 38°7'18.240"N 79°36'26.379"W. 388 m, 10.06.2024, Tkach 821 & R. Folk (HAL)
Micranthes divaricata Losinsk.	Melanocentrae (Engl. & Irmsch.) Tkach		1.53241	0.0338946	749.35	—		[2x]	[11]	[0.77]	[0.07]	Solanum lycopersicum L. 'Stupické polní rané'	0.781844	silica gel-dried	China, Sichuan, Ganzi Autonomous Prefecture, Lake Yariacuó, 30°25'02.47"N 101°43'01.54"E, 4231 m, 18.08.2018, N. Tkach 491, S. Gebauer & A. Favre (HAL)
Micranthes divaricata Losinsk.	Melanocentrae (Engl. & Irmsch.) Tkach		1.56661	0.0285845	766.074	—		[2x]	[11]	[0.79]	[0.07]	Solanum lycopersicum L. 'Stupické polní rané'	0.799293	silica gel-dried	China, Sichuan, Tagong, Anna Gompa monastery, 30°21'00.5"N 101°36'09.28"E, 3696 m, 17.08.2018, N. Tkach 486, S. Gebauer & A. Favre (HAL)
Micranthes lumpuensis (Engl.) Losinsk.	Melanocentrae (Engl. & Irmsch.) Tkach		1.65529	0.0158116	809.437	—		[2x]	[11]	[0.83]	[0.09]	Solanum lycopersicum L. 'Stupické polní rané'	0.844536	silica gel-dried	China, Sichuan, Songpan, Tianhuashan pass, 32°44'55.03"N 103°43'34.95"E, 4050 m, 09.08.2018, N. Tkach 451, S. Gebauer, A. Favre (HAL)
Micranthes micranthidifolia (Haw.) Small	Micranthes		3.07425	0.0644693	1503.31	22		2x	11	[1.53]	[0.14]	Zea mays L. 'CE-777'	0.566161	silica gel-dried	USA, North Carolina, Great Smoky Mountains NP, Maggie Valley, 35°33'58.900"N 83°5'1.297"W, 1257 m, 05.06.2024, N. Tkach 804 & R. Folk (HAL)
Micranthes nelsoniana (D.Don) Small	Rotundifoliatae (A.M.Johnson) Tkach		1.63721	0.116239	800.594	ca. 60, 60, ca. 70, ca. 80, 80, 84	24, 26, 28, 29, ca. 30, 50, 54, 56, 60, 78 in: Fukuda, T., Andreeva, E., Taran, A., Takahashi, H., & Ikeda, H. (2016). Chromosome number of Micranthes nelsoniana (D. Don) Small (Saxifragaceae) in northeast Asia. Caryologia, 69(4), 325–329. https://doi.org/10.1080/00087114.2016.1215091; Fukuda, T., Ishikawa, N., Chernyagina, O.A., Barkalov, V.Y., Taran, A.A., Yakubov, V.V., Marchuk, E.A., Linnik, …	[2x]	?	[0.82]	?	Zea mays L. 'CE-777'	0.301511	silica gel-dried	Russia, Kamtchatka, Tolbachik volcano, 11.09.2015, A. Jochum 1503 (LZ224186)
Micranthes odontoloma (Piper) A.Heller	Rotundifoliatae (A.M.Johnson) Tkach		4.40203	0.0524663	2152.59	24, 48. Original count of 2n=24 not found. Jepson Manual cites only 2n=48. 2n=24 probably rests on erroneous statement in the Flora of North America.	48 in: Calder JA, Savile DBO. (1959) Studies in Saxifragaceae – II. Saxifraga sect. Trachyphyllum in North America. Brittonia 11:228–249. https://doi.org/10.2307/2805008; Beamish, K.I. (1961) Studies of miosis in the genus Saxifraga of the Pacific Northwest. Can. J. Botany. 39: 567-580. https://doi.org/10.1139/b61-046	[4x]	?	[1.10]	?	Pisum sativum L. 'Ctirad'	0.484272	silica gel-dried	USA, Utah, Salt Lake City, Wasatch Range, 40°40'32.443"N 111°38'44.477"W, 2500 m, 04.07.2024, N. Tkach 842 (HAL)
Micranthes pallida (Wall. ex Ser.) Losinsk.	Melanocentrae (Engl. & Irmsch.) Tkach		2.74858	0.0401966	1344.05	22, 44, 66	16 in: Kumar, S. Kumari, S., Gupta, R.C., Sharma, V.K. 2013. Additions to the cytology of Saxifraga (Saxifragaceae) from the Western Himalayas, India. Botanica Serbica 37(2): 147-153.	[2x]	11	[1.38]	[0.13]	Zea mays L. 'CE-777'	0.506184	silica gel-dried	China, Yunnan, Bashuitai, 27°31.036'N 099°59.846'E, 3617 m, 20.08.2011, A. Favre & S. Matuszak 137 (FR, KUN)
Micranthes pallida (Wall. ex Ser.) Losinsk.	Melanocentrae (Engl. & Irmsch.) Tkach		2.75171	0.00454577	1345.59	22, 44, 66	16 in: Kumar, S. Kumari, S., Gupta, R.C., Sharma, V.K. 2013. Additions to the cytology of Saxifraga (Saxifragaceae) from the Western Himalayas, India. Botanica Serbica 37(2): 147-153.	[2x]	11	[1.38]	[0.13]	Zea mays L. 'CE-777'	0.506761	silica gel-dried	China, Yunnan, Niyiang, Kawakarpo, 27°57.083'N 98°29.994'E, 3639 m, 02.08.2011, A. Favre & S. Matuszak 53 (FR, KUN)
Micranthes pallida (Wall. ex Ser.) Losinsk.	Melanocentrae (Engl. & Irmsch.) Tkach		2.79194	0.0651393	1365.26	22, 44, 66	16 in: Kumar, S. Kumari, S., Gupta, R.C., Sharma, V.K. 2013. Additions to the cytology of Saxifraga (Saxifragaceae) from the Western Himalayas, India. Botanica Serbica 37(2): 147-153.	[2x]	11	[1.40]	[0.13]	Zea mays L. 'CE-777'	0.51417	silica gel-dried	China, Yunnan, Lijiang, 27°10.185'N 100°14.589'E, 3517 m, 18.08.2011, A. Favre & S. Matuszak 111 (FR, KUN)
Micranthes pallida (Wall. ex Ser.) Losinsk.	Melanocentrae (Engl. & Irmsch.) Tkach		9.25887	0.305885	4527.59	22, 44, 66	16 in: Kumar, S. Kumari, S., Gupta, R.C., Sharma, V.K. 2013. Additions to the cytology of Saxifraga (Saxifragaceae) from the Western Himalayas, India. Botanica Serbica 37(2): 147-153.	[≥6x]	11	[≤1.54]	?	Secale cereale L. 'Daňkovské'	0.571889	silica gel-dried	China, Yunnan, Dali, 25°39.790'N 100°05.906'E, 3907 m, 09.08.2011, A. Favre & S. Matuszak 54 (FR, KUN)
Micranthes pensylvanica L.	Micranthes		25.3146	0.200158	12378.9	56, 58 (Skovsted), 84, 112		?	?	?	?	Secale cereale L. 'Daňkovské'	1.5636	silica gel-dried	cult. BG Munich (Germany) IPEN: XX-0-M-A/0285; photographic voucher (N. Tkach)
Micranthes petiolaris (Raf.) Bush	Stellares (Engl. & Irmsch.) Tkach		1.32638	0.0115477	648.6	—		[2x]	?	[0.67]	?	Solanum lycopersicum L. 'Stupické polní rané'	0.676724	silica gel-dried	USA, South Carolina, Cedar Mountain, 35°8'4.470"N 82°25'38.836"W, 535 m, 08.06.2024, N. Tkach 810 & R. Folk (HAL)
Micranthes sachalinensis (F.Schmidt) S.Akyama & H.Ohba	Micranthes		3.33013	0.0269029	1628.43	—	16, 40 in: Funamoto, T. & Nakamura, T. (1993) Notes on somatic chromosome numbers in Japanese Saxifraga (2), Karyotypes of four alpine Saxifraga species. La Kromosomo II—70: 2411–2416.	[4x ?]	?	?	?	Zea mays L. 'CE-777'	0.613283	silica gel-dried	cult. BG Tübingen (Germany) acc. no. 5063; photographic voucher (N. Tkach)
Ozomelis stauropetala (Piper) Rydb.			0.550759	0.0102183	269.321	14		2x	7	0.28	0.04	Raphanus sativus L. 'Saxa'	0.496179	silica gel-dried	USA, Utah, Salt Lake City, Wasatch Range, 40°40'32.443"N 111°38'44.477"W, 2500 m, 04.07.2024, Tkach 833 (HAL)
