# Supplementary material for: Genome sizes and chromosomal repatterning in the evolution of Saxifraga and other Saxifragaceae
Source: Research Square preprint supplement (doi:10.21203/rs.3.rs-8115725/v1), 2025-11-25
Supplement: Supplementary file 5 [file 6e2d7f61808ced2234ca770e.docx]

**Table 2** Species of *Saxifraga* and other Saxifragaceae genera studied for genome sizes, providing their 2C values, recorded 2*n* chromosome numbers, ploidy levels, chromosome base numbers, and the calculated 1Cx values and mean chromosome DNA contents (MCs) derived from these. Estimated data based on the 2C values and available chromosome counts for related species of the same section or subsection are indicated in square brackets. In cases of multiple chromosome counts, the most probable 2*n* chromosome number of the studied accession is written in bold. See Online Resource 1 for details and references. The systematic arrangement within *Saxifraga* follows Table 1. The sections of *Micranthes* were taken from Tkach et al. (2015b). *N/A* not available

| **Taxon** | | | | **2C value [pg]** | **2*n* =** | **Ploidy level** | ***x* =** | **1Cx value [pg]** | **MC [pg]** |
| --- | --- | --- | --- | --- | --- | --- | --- | --- | --- |
| ***Saxifraga* L.** | | | |  |  |  |  |  |  |
|  | **sect. *Irregulares* Haw.** | | | | | | | | |
|  |  |  | *S. fortunei* Hook. | 1.83 | 22 | 2*x* | 11 | 0.92 | 0.08 |
|  |  |  | *S. rufescens* Balf.f. | 12.36 | N/A | N/A | N/A | N/A | N/A |
|  |  |  | *S. stolonifera* Curtis | 2.15 | 30, 32, 36, 54, 56 | N/A | 9 ? | N/A | N/A |
|  |  |  |  | 2.58 | 30, 32, 36, 54, 56 | N/A | 9 ? | N/A | N/A |
|  |  |  | *S. veitchiana* Balf.f. | 2.27 | N/A | N/A | [9 ?] | N/A | N/A |
|  | **sect. *Bronchiales* DeChaine** | | | | | | |  |  |
|  |  |  | *S.* *austromontana* Wiegand | 4.37 | 26, [≈ **52**] | [4*x*] | [13] | [1.09] | [0.08] |
|  |  |  | *S. bronchialis* L. subsp. *bronchialis* | 7.56 | 26–150, [≈ **104**] | [8*x*] | [13] | [0.95] | [0.07] |
|  |  |  | *S. derbekii* Sipliv. | 2.24 | [26] | [2*x*] | [13] | [1.12] | [0.09] |
|  |  |  | *S. rebunshirensis* (Engl. & Irmsch.) Sipliv. | 5.28 | **48**, 50 | 4*x* | 13 | 1.32 | 0.10 |
|  |  |  | *S. spinulosa* Adams | 4.36 | **50**, 80 | 4*x* | 13 | 1.09 | 0.08 |
|  | **sect. *Ciliatae* Haw.** | | |  |  |  |  |  |  |
|  |  | **Clade 1** | | | |  |  |  |  |
|  |  |  | *S. filicaulis* Wall. ex Ser. | 2.63 | **16**, 24, 32 | 2*x* | 8 | 1.32 | 0.16 |
|  |  |  |  | 2.86 | **16**, 24, 32 | 2*x* | 8 | 1.43 | 0.18 |
|  |  |  |  | 4.89 | 16, 24, **32** | [4*x*] | 8 | [1.22] | [0.15] |
|  |  |  |  | 5.09 | 16, 24, **32** | [4*x*] | 8 | [1.27] | [0.16] |
|  |  |  |  | 6.27 | 16, 24, **32** | [4*x* ?] | 8 | [1.57] | [0.20] |
|  |  |  | *S. gemmipara* Franch. | 7.91 | [32] | [4*x*] | [8] | [1.98] | [0.25] |
|  |  |  |  | 10.47 | [≥48] | [≥6*x*] | [8] | [≤1.75] | [≤0.22] |
|  |  |  |  | 12.12 | [≥48] | [≥6*x*] | [8] | [≤2.02] | [≤0.25] |
|  |  |  | *S. hypericoides* Franch. | 6.25 | [32] | [4*x*] | [8] | [1.56] | [0.20] |
|  |  |  |  | 7.03 | [32] | [4*x*] | [8] | [1.76] | [0.22] |
|  |  |  |  | 7.58 | [32] | [4*x*] | [8] | [1.90] | [0.24] |
|  |  |  |  | 12.61 | [≥48] | [≥6*x*] | [8] | [≤2.10] | [≤0.26] |
|  |  |  | *S. oreophila* Franch. | 6.77 | [32] | [4*x*] | [8] | [1.69] | [0.21] |
|  |  |  | *S. strigosa* Wall. ex Ser. | 6.92 | 16, **32** | [4*x*] | 8 | [1.15] | [0.22] |
|  |  |  |  | 6.99 | 16, **32** | [4*x*] | 8 | [1.17] | [0.22] |
|  |  |  |  | 7.53 | 16, **32** | [4*x*] | 8 | [1.88] | [0.24] |
|  |  | **Clade 2** | | | |  |  |  |  |
|  |  |  | *S. candelabrum* Franch. | 6.09 | [32] | [4*x*] | [8] | [1.52] | [0.24] |
|  |  |  |  | 6.31 | [32] | [4*x*] | [8] | [1.57] | [0.20] |
|  |  |  | *S. flexilis* W.W.Sm. | 9.82 | [48] | [4*x*] | [8] | [1.64] | [0.20] |
|  |  |  | *S. llonakhensis* W.W.Sm. | 3.74 | [16] | [4*x*] | [8] | [1.87] | [0.23] |
|  |  |  | *S. sediformis* Engl. & Irmsch. | 5.87 | [32] | [4*x*] | [8] | [1.47] | [0.18] |
|  |  |  | *S. glacialis* Harry Sm. | 4.02 | [16] | [4*x*] | [8] | [2.01] | [0.25] |
|  |  | **subsect. *Hirculoideae* (Clade 3)** | | | |  |  |  |  |
|  |  |  | *S. aristulata* Hook.f. & Thomson | 3.53 | 16 | 2*x* | 8 | 1.77 | 0.22 |
|  |  |  |  | 11.46 | 16, [≥**48**] | [≥6*x*] | 8 | [≤1.91] | [≤0.24] |
|  |  |  | *S. cardiophylla* Franch. | 7.51 | **32**, 48 | [4*x*] | 8 | [1.88] | [0.23] |
|  |  |  |  | 7.82 | **32**, 48 | [4*x*] | 8 | [1.96] | [0.24] |
|  |  |  | *S. implicans* Harry Sm. | 8.31 | 16, 32, **48** | [4*x*] | 8 | [1.39] | [0.17] |
|  |  |  |  | 14.87 | 16, 32, 48, [≥**80**] | [≥10*x*] | 8 | [≤1.49] | [≤0.19] |
|  |  |  | *S. moorcroftiana* (Ser.) Wall. ex Sternb. | 7.74 | 16, [32] | [4*x*] | 8 | [1.94] | [0.24] |
|  |  |  | *S. omphalodifolia* Hand.-Mazz. | 6.86 | [32] | [4*x*] | [8] | [1.72] | [0.21] |
|  |  |  | *S. tsangchanensis* Franch. | 8.39 | [48] | [6*x*] | [8] | [1.40] | [0.17] |
|  | **sect. *Cymbalaria* Griseb.** | | | | |  |  |  |  |
|  |  |  | *S. cymbalaria* L. | 1.87 | 18 | 2*x* | 9 | 0.94 | 0.10 |
|  |  |  |  | 1.93 | 18 | 2*x* | 9 | 0.97 | 0.11 |
|  |  |  | *S. huetiana* Boiss. | 1.42 | 18 | 2*x* | 9 | 0.71 | 0.08 |
|  | **sect. *Mesogyne* Sternb.** | | | | |  |  |  |  |
|  |  |  | *S. sibirica* L. | 0.99 | 16, 20, 26, 28, 32, 48, 60 | 2*x* | 13 ? | 0.50 | 0.04 ? |
|  |  |  |  | 1.04 | 16, 20, 26, 28, 32, 48, 60 | 2*x* | 13 ? | 0.52 | 0.04 ? |
|  | **sect. *Saxifraga*** | | | | |  |  |  |  |
|  |  | **subsect. *Irriguae* (Engl. & Irmsch.) Tkach, Spielau, D.Horák & Röser** | | | | |  |  |  |
|  |  |  | *S. irrigua* M.Bieb. | 2.40 | 44 | 4*x* | 11 | 0.60 | 0.05 |
|  |  | **subsect. *Androsaceae* (Engl. & Irmsch.) Tkach, Röser & M.H.Hoffm.** | | | | |  |  |  |
|  |  |  | *S. androsacea* L. | 1.46 | 16, 66–220 | N/A | [11 ?] | N/A | N/A |
|  |  |  |  | 1.56 | 16, 66–220 | N/A | [11 ?] | N/A | N/A |
|  |  | **subsect. *Tridactylites* (Haw.) Gornall** | | | | |  |  |  |
|  |  |  | *S. tridactylites* L. | 1.36 | 22 | 2*x* | 11 | 0.68 | 0.06 |
|  |  | **subsect. *Arachnoideae* (Engl. & Irmsch.) Tkach, Röser & M.H.Hoffm.** | | | | | | | |
|  |  |  | *S. arachnoidea* Sternb. | 1.01 | 66 | 6*x* | 11 | 0.17 | 0.02 |
|  |  |  | *S. berica* (Bég.) D.A.Webb | 0.87 | [66] | [6*x*] | [11] | [0.14] | [0.01] |
|  |  |  | *S. berica* × *S.* *petraea* L. | 0.97 | [66] | [6*x*] | [11] | [0.16] | [0.02] |
|  |  |  | *S. paradoxa* Sternb. | 0.92 | 64 | 6*x* | 11 | 0.15 | 0.01 |
|  |  |  | *S. petraea* L. | 0.97 | 64 | 6*x* | 11 | 0.16 | 0.01 |
|  |  |  | *S. tenella* Wulfen | 0.88 | 64, 66 | 6*x* | 11 | 0.15 | 0.01 |
|  |  |  |  | 0.91 | 64, 66 | 6*x* | 11 | 0.15 | 0.01 |
|  |  | **subsect. *Saxifraga*** | | | | |  |  |  |
|  |  |  | *S. biternata* Boiss. | 2.11 | 66 | 6*x* | 11 | 0.35 | 0.03 |
|  |  |  | *S. cebennensis* Rouy & E.G.Camus | 1.27 | **26**, 32 | [2*x*] | [13] | [0.63] | [0.05] |
|  |  |  | *S. cespitosa* L. | 4.34 | 52–80 | N/A | N/A | N/A | N/A |
|  |  |  |  | 5.56 | 52–80 | N/A | N/A | N/A | N/A |
|  |  |  | *S. cuneata* Willd. | 2.94 | 26, 28, 36, 38 | N/A | N/A | N/A | N/A |
|  |  |  | *S. erioblasta* Boiss. & Reut. | 1.96 | 32–34 | N/A | N/A | N/A | N/A |
|  |  |  | *S. exarata* Vill. | 1.63 | 20–136 | N/A | N/A | N/A | N/A |
|  |  |  |  | 1.63 | 20–136 | N/A | N/A | N/A | N/A |
|  |  |  |  | 2.87 | 20–136 | N/A | N/A | N/A | N/A |
|  |  |  |  | 1.96 | 20–136 | N/A | N/A | N/A | N/A |
|  |  |  | *S. fragosoi* Sennen | 1.73 | 34, 36, **52** | 4*x* | 13 | 0.43 | 0.03 |
|  |  |  | *S. geranioides* L. | 1.65 | 32, **52** | 4*x* | 13 | 0.41 | 0.03 |
|  |  |  | *S. granulata* L. | 5.90 | 22–60 | N/A | N/A | N/A | N/A |
|  |  |  | *S. hypnoides* L. | 3.51 | 26–64 | N/A | N/A | N/A | N/A |
|  |  |  |  | 3.88 | 26–64 | N/A | N/A | N/A | N/A |
|  |  |  | *S. iratiana* F.W.Schultz | 1.27 | 26 | 2*x* | 13 | 0.63 | 0.05 |
|  |  |  | *S. moncayensis* D.A.Webb. | 1.27 | ca. 60 | N/A | N/A | N/A | N/A |
|  |  |  |  | 1.27 | ca. 60 | N/A | N/A | N/A | N/A |
|  |  |  | *S. moschata* Wulf. | 1.33 | 22–52 | N/A | N/A | N/A | N/A |
|  |  |  |  | 1.39 | 22–52 | N/A | N/A | N/A | N/A |
|  |  |  |  | 1.59 | 22–52 | N/A | N/A | N/A | N/A |
|  |  |  |  | 4.29 | 22–52 | N/A | N/A | N/A | N/A |
|  |  |  | *S. nevadensis* Boiss. & Reut. | 1.59 | 58 | N/A | N/A | N/A | N/A |
|  |  |  | *S. pedemontana* subsp. *cervicornis* (Viv.) Arcang. | 1.88 | 26–52 | N/A | N/A | N/A | N/A |
|  |  |  | *S. rosacea* Moench s.l. | 3.12 | 32–64 | N/A | N/A | N/A | N/A |
|  |  |  |  | 4.07 | 32–64 | N/A | N/A | N/A | N/A |
|  |  |  |  | 4.35 | 32–64 | N/A | N/A | N/A | N/A |
|  |  |  | *S. trifurcata* Schrad. | 3.88 | 28–44 | N/A | N/A | N/A | N/A |
|  |  |  | *S. vayredana* Luizet | 1.28 | 60, 62, ca. 64 | [6*x*] | [11] | [0.21] | [0.02] |
|  |  |  |  | 1.42 | 60, 62, ca. 64 | [6*x*] | [11] | [0.24] | [0.02] |
|  | **sect. *Cotylea* Tausch** | | | | | |  |  |  |
|  |  |  | *S. rotundifolia* L. | 3.36 | 22 | 2*x* | 11 | 1.68 | 0.15 |
|  |  |  |  | 3.67 | 22 | 2*x* | 11 | 1.84 | 0.17 |
|  |  |  |  | 4.62 | 22 | 3*x* ? | 11 | 1.54 ? | 0.14 ? |
|  |  |  | *S. rotundifolia* var. *coriifolia* Sommier & Levier | 3.39 | 22 | 2*x* | 11 | 1.69 | 0.15 |
|  | **sect. *Gymnopera* D.Don** | | | | | | |  |  |
|  |  |  | *S. cuneifolia* L. | 3.94 | 28 | 2*x* | 14 | 1.97 | 0.14 |
|  |  |  | *S. hirsuta* L. | 4.12 | 28 | 2*x* | 14 | 2.06 | 0.15 |
|  |  |  | *S. hirsuta* subsp. *hirsuta* | 4.14 | 28 | 2*x* | 14 | 2.07 | 0.15 |
|  |  |  | *S. umbrosa* L. | 3.43 | 28 | 2*x* | 14 | 1.72 | 0.12 |
|  |  |  |  | 3.45 | 28 | 2*x* | 14 | 1.73 | 0.12 |
|  |  |  |  | 3.48 | 28 | 2*x* | 14 | 1.74 | 0.12 |
|  |  |  |  | 3.42 | 28 | 2*x* | 14 | 1.71 | 0.12 |
|  | **sect. *Ligulatae* Haw.** | | | | | |  |  |  |
|  |  |  | *S. callosa* Sm. | 3.28 | 28 | 2*x* | 14 | 1.64 | 0.12 |
|  |  |  |  | 3.51 | 28 | 2*x* | 14 | 1.75 | 0.13 |
|  |  |  |  | 3.55 | 28 | 2*x* | 14 | 1.77 | 0.13 |
|  |  |  | *S. callosa* subsp. *callosa* | 3.33 | 28 | 2*x* | 14 | 1.66 | 0.12 |
|  |  |  | *S. callosa* cv. ‘Albertii’ | 3.29 | [28] | [2*x*] | [14] | [1.65] | [0.12] |
|  |  |  |  | 3.29 | [28] | [2*x*] | [14] | [1.65] | [0.12] |
|  |  |  |  | 3.34 | [28] | [2*x*] | [14] | [1.67] | [0.12] |
|  |  |  | *S. cartilaginea* Willd. | 3.89 | [28] | [2*x*] | [14] | [1.94] | [0.14] |
|  |  |  | *S. catalaunica* Boiss. & Reut. | 3.89 | [28] | [2*x*] | [14] | [1.94] | [0.14] |
|  |  |  | *S. cochlearis* Rchb. | 3.48 | 28 | 2*x* | 14 | 1.74 | 0.13 |
|  |  |  | *S. cotyledon* L. | 3.22 | 28 | 2*x* | 14 | 1.61 | 0.12 |
|  |  |  |  | 3.64 | 28 | 2*x* | 14 | 1.82 | 0.14 |
|  |  |  | *S. crustata* Vest | 3.71 | 28 | 2*x* | 14 | 1.85 | 0.13 |
|  |  |  |  | 4.02 | 28 | 2*x* | 14 | 2.01 | 0.14 |
|  |  |  |  | 4.21 | 28 | 2*x* | 14 | 2.11 | 0.15 |
|  |  |  | *S. hostii* Tausch | 3.24 | 28 | 2*x* | 14 | 1.62 | 0.12 |
|  |  |  | *S. hostii* subsp. *hostii* | 3.29 | 28 | 2*x* | 14 | 1.65 | 0.12 |
|  |  |  | *S. hostii* subsp. *rhaetica* (A.Kern. ex Engl.) Braun-Blanq. | 3.70 | 28 | 2*x* | 14 | 1.85 | 0.13 |
|  |  |  | *S. khiakhensis* Holubec & Křivka | 3.56 | [28] | [2*x*] | [14] | [1.78] | [0.13] |
|  |  |  | *S. kolenatiana* Regel | 3.78 | 24 ?, [28] | 2*x* | [14] | 1.89 | [0.13] |
|  |  |  | *S. longifolia* Lapeyr. | 3.50 | 28 | 2*x* | 14 | 1.75 | 0.13 |
|  |  |  |  | 3.73 | 28 | 2*x* | 14 | 1.86 | 0.13 |
|  |  |  |  | 3.87 | 28 | 2*x* | 14 | 1.93 | 0.14 |
|  |  |  | *S. paniculata* Mill. | 3.14 | 28 | 2*x* | 14 | 1.57 | 0.11 |
|  |  |  |  | 3.16 | 28 | 2*x* | 14 | 1.58 | 0.11 |
|  |  |  |  | 3.17 | 28 | 2*x* | 14 | 1.58 | 0.11 |
|  |  |  |  | 3.26 | 28 | 2*x* | 14 | 1.63 | 0.12 |
|  |  |  |  | 3.13 | 28 | 2*x* | 14 | 1.57 | 0.11 |
|  |  |  | *S. paniculata* cv. ‘Baldensis’ | 3.25 | [28] | [2*x*] | [14] | [1.62] | [0.12] |
|  |  |  | *S. paniculata* × *S.* *valdensis* DC. | 3.23 | [28] | [2*x*] | [14] | [1.62] | [0.12] |
|  | **sect. *Trachyphyllum* (Gaudin) W.D.J.Koch** | | | | | | | |  |
|  |  |  | *S. aspera* L. | 3.05 | 26 | 2*x* | 13 | 1.53 | 0.12 |
|  |  |  |  | 3.07 | 26 | 2*x* | 13 | 1.54 | 0.12 |
|  |  |  |  | 3.08 | 26 | 2*x* | 13 | 1.54 | 0.12 |
|  |  |  |  | 3.52 | 26 | 2*x* | 13 | 1.76 | 0.14 |
|  |  |  | *S. bryoides* L. | 3.00 | 26 | 2*x* | 13 | 1.50 | 0.12 |
|  |  |  |  | 3.19 | 26 | 2*x* | 13 | 1.60 | 0.12 |
|  | **sect. *Porphyrion* Tausch** | | | | | | | |  |
|  |  | **subsect. *Kabschia* (Engl.) Rouy & Camus** | | | | | | | |
|  |  |  | *S.* ×*alpigena* Harry Sm. (*S. andersonii* Engl. × *S.* *quadrifaria* Engl. & Irmsch.; fide Bürgel 2007) | 2.22 | [26] | [2*x*] | [13] | [1.11] | [0.09] |
|  |  |  | *S. andersonii* Engl. | 2.33 | 26 | 2*x* | 13 | 1.16 | 0.09 |
|  |  |  | *S. aretioides* Lapeyr. | 1.73 | 26 | 2*x* | 13 | 0.87 | 0.07 |
|  |  |  | *S. burseriana* L. | 2.39 | 26 | 2*x* | 13 | 1.19 | 0.09 |
|  |  |  |  | 2.52 | 26 | 2*x* | 13 | 1.26 | 0.10 |
|  |  |  |  | 2.53 | 26 | 2*x* | 13 | 1.27 | 0.10 |
|  |  |  |  | 2.58 | 26 | 2*x* | 13 | 1.29 | 0.10 |
|  |  |  |  | 2.62 | 26 | 2*x* | 13 | 1.31 | 0.10 |
|  |  |  | *S. caucasica* Sommier & Levier | 1.60 | [26] | [2*x*] | [13] | [0.80] | [0.06] |
|  |  |  | *S. charadzeae* Otsch. | 1.69 | [26] | [2*x*] | [13] | [0.85] | [0.07] |
|  |  |  |  | 1.66 | [26] | [2*x*] | [13] | [0.83] | [0.06] |
|  |  |  | *S. cinerea* Harry Sm. | 2.59 | [26] | [2*x*] | [13] | [1.30] | [0.10] |
|  |  |  | *S. desoulavyi* Oett. | 1.71 | [26] | [2*x*] | [13] | [0.86] | [0.07] |
|  |  |  |  | 1.68 | [26] | [2*x*] | [13] | [0.84] | [0.06] |
|  |  |  | *S.* cf. *desoulavyi* | 1.78 | [26] | [2*x*] | [13] | [0.89] | [0.07] |
|  |  |  |  | 1.75 | [26] | [2*x*] | [13] | [0.87] | [0.07] |
|  |  |  |  | 1.76 | [26] | [2*x*] | [13] | [0.88] | [0.07] |
|  |  |  | *S. diapensioides* Bellardi | 2.57 | 26 | 2*x* | 13 | 1.28 | 0.10 |
|  |  |  | *S. dinnikii* Schmalh. ex Akinf. | 1.75 | [26] | [2*x*] | [13] | [0.88] | [0.07] |
|  |  |  | *S. federici-augusti* Biasol. | 2.18 | [26] | [2*x*] | [13] | [1.09] | [0.08] |
|  |  |  |  | 2.19 | [26] | [2*x*] | [13] | [1.09] | [0.08] |
|  |  |  | *S. federici-augusti* subsp. *federici-augusti* | 2.65 | [26] | [2*x*] | [13] | [1.33] | [0.10] |
|  |  |  | *S. federici-augusti* subsp. *grisebachii* (Degen & Dörfl.) D.A.Webb | 2.50 | 26 | 2*x* | 13 | 1.25 | 0.10 |
|  |  |  |  | 2.59 | 26 | 2*x* | 13 | 1.29 | 0.10 |
|  |  |  | *S. ferdinandi-coburgi* Kellerer & Sünd. | 1.89 | 26 | 2*x* | 13 | 0.95 | 0.07 |
|  |  |  |  | 2.20 | 26 | 2*x* | 13 | 1.10 | 0.08 |
|  |  |  |  | 2.26 | 26 | 2*x* | 13 | 1.13 | 0.09 |
|  |  |  | *S. iranica* Bornm. | 1.43 | [26] | [2*x*] | [13] | [0.71] | [0.05] |
|  |  |  | *S. juniperifolia* Adams | 2.33 | 26 | 2*x* | 13 | 0.78 | 0.06 |
|  |  |  | *S. kotschyi* Boiss. | 1.84 | [26] | [2*x*] | [13] | [0.92] | [0.07] |
|  |  |  | *S. likiangensis* Franch. | 2.49 | [26] | [2*x*] | [13] | [1.25] | [0.10] |
|  |  |  | *S. luteoviridis* Schott & Kotschy | 1.98 | [26] | [2*x*] | [13] | [0.99] | [0.08] |
|  |  |  | *S. macedonica* Degen | 1.73 | [26] | [2*x*] | [13] | [0.87] | [0.07] |
|  |  |  |  | 1.75 | [26] | [2*x*] | [13] | [0.88] | [0.07] |
|  |  |  | *S. marginata* Sternb. | 2.25 | [26] | [2*x*] | [13] | [1.13] | [0.09] |
|  |  |  |  | 2.22 | [26] | [2*x*] | [13] | [1.11] | [0.10] |
|  |  |  |  | 2.29 | [26] | [2*x*] | [13] | [1.15] | [0.09] |
|  |  |  |  | 2.29 | [26] | [2*x*] | [13] | [1.15] | [0.09] |
|  |  |  | *S. marginata* var. *coriophylla* (Griseb.) Engl. & Irmsch. | 1.87 | [26] | [2*x*] | [13] | [0.93] | [0.07] |
|  |  |  |  | 1.91 | [26] | [2*x*] | [13] | [0.96] | [0.07] |
|  |  |  | *S. media* Gouan | 2.17 | 26 | 2*x* | 13 | 1.09 | 0.08 |
|  |  |  | *S. nana* Engl. & Irmsch. | 2.28 | [26] | [2*x*] | [13] | [1.14] | [0.09] |
|  |  |  |  | 2.32 | [26] | [2*x*] | [13] | [1.16] | [0.09] |
|  |  |  |  | 2.32 | [26] | [2*x*] | [13] | [1.16] | [0.09] |
|  |  |  | *S. poluniniana* Harry Sm. | 2.30 | [26] | [2*x*] | [13] | [1.15] | [0.09] |
|  |  |  | *S. pulchra* Engl. & Irmsch. | 2.63 | [26] | [2*x*] | [13] | [1.32] | [0.10] |
|  |  |  | *S. ramsarica* Jamzad | 1.55 | [26] | [2*x*] | [13] | [0.78] | [0.06] |
|  |  |  | *S.* ×*malbyana* Horný, Soják & Webr cv. ‘Hedwig’ (*S. aretioides* × *diapensioides*). | 2.08 | [26] | [2*x*] | [13] | [1.04] | [0.08] |
|  |  |  | *S. sancta* Griseb. | 2.22 | [26] | [2*x*] | [13] | [1.11] | [0.10] |
|  |  |  |  | 2.23 | [26] | [2*x*] | [13] | [1.12] | [0.10] |
|  |  |  | *S. scardica* Griseb. | 1.90 | 26 | 2*x* | 13 | 0.95 | 0.07 |
|  |  |  |  | 2.20 | 26 | 2*x* | 13 | 1.10 | 0.08 |
|  |  |  |  | 2.33 | 26 | 2*x* | 13 | 1.17 | 0.09 |
|  |  |  | *S. scardica* subsp. *scardica* | 1.88 | 26 | 2*x* | 13 | 0.94 | 0.07 |
|  |  |  |  | 1.88 | 26 | 2*x* | 13 | 0.94 | 0.07 |
|  |  |  | *S.* cf. *scardica* | 1.74 | 26 | 2*x* | 13 | 0.87 | 0.07 |
|  |  |  |  | 1.89 | 26 | 2*x* | 13 | 0.95 | 0.07 |
|  |  |  | *S. scleropoda* Sommier & Levier | 2.06 | [26] | [2*x*] | [13] | [1.03] | [0.08] |
|  |  |  | *S.* cf. *scleropoda* | 1.54 | [26] | [2*x*] | [13] | [0.77] | [0.06] |
|  |  |  |  | 1.66 | [26] | [2*x*] | [13] | [0.83] | [0.06] |
|  |  |  | *S. sempervivum* K.Koch | 2.11 | 12, [26] | [2*x*] | [13] | [1.06] | [0.08] |
|  |  |  |  | 2.11 | 12, [26] | [2*x*] | [13] | [1.06] | [0.08] |
|  |  |  |  | 2.11 | 12, [26] | [2*x*] | [13] | [1.06] | [0.08] |
|  |  |  |  | 2.11 | 12, [26] | [2*x*] | [13] | [1.06] | [0.08] |
|  |  |  | *S.* sp. | 3.15 | [26] | [2*x*] | [13] | [1.58] | [0.11] |
|  |  |  | *S.* sp. | 3.70 | [26] | [2*x*] | [13] | [1.85] | [0.13] |
|  |  |  | *S.* sp. | 1.56 | [26] | [2*x*] | [13] | [0.78] | [0.10] |
|  |  |  | *S.* sp. | 1.84 | [26] | [2*x*] | [13] | [0.92] | [0.07] |
|  |  |  | *S.* sp. | 1.88 | [26] | [2*x*] | [13] | [0.94] | [0.07] |
|  |  |  | *S. spruneri* Boiss. | 1.50 | **26**, 28 | 2*x* | 13 | 0.75 | 0.06 |
|  |  |  |  | 1.51 | **26**, 28 | 2*x* | 13 | 0.76 | 0.06 |
|  |  |  | *S. stribrnyi* (Velen.) Podp. | 2.41 | 26 | 2*x* | 13 | 1.20 | 0.09 |
|  |  |  |  | 2.66 | 26 | 2*x* | 13 | 1.33 | 0.10 |
|  |  |  | *S. subverticillata* Boiss. | 1.96 | [26] | [2*x*] | [13] | [0.98] | [0.08] |
|  |  |  | *S. tombeanensis* Boiss. ex Engl. | 2.15 | 26 | 2*x* | 13 | 1.08 | 0.08 |
|  |  |  |  | 2.18 | 26 | 2*x* | 13 | 1.09 | 0.08 |
|  |  |  | *S. unguipetala* Engl. & Irmsch. | 2.04 | [26] | [2*x*] | [13] | [1.02] | [0.08] |
|  |  |  | *S. unifoveolata* Sipliv. | 1.64 | [26] | [2*x*] | [13] | [0.82] | [0.06] |
|  |  |  |  | 1.68 | [26] | [2*x*] | [13] | [0.84] | [0.06] |
|  |  |  |  | 2.01 | [26] | [2*x*] | [13] | [1.01] | [0.08] |
|  |  |  | *S. vandellii* Sternb. | 2.37 | 26 | 2*x* | 13 | 1.19 | 0.09 |
|  |  | **subsect. *Oppositifoliae* Hayek** | | | | | | | |
|  |  |  | *S. oppositifolia* L. | 3.00 | **26**, 28, 52 | 2*x* | 13 | 1.50 | 0.12 |
|  |  |  |  | 3.41 | **26**, 28, 52 | 2*x* | 13 | 1.70 | 0.13 |
|  |  |  | *S. oppositifolia* subsp. *latina* (A.Terracc.) Arrigoni | 3.26 | [26] | [2*x*] | [13] | [1.63] | [0.13] |
|  |  |  | *S. retusa* subsp. *augustata* (Vacc.) P.Fourn. | 2.50 | 26 | 2*x* | 13 | 1.25 | 0.10 |
|  |  |  | *S. retusa* Goun subsp. *retusa* | 2.50 | [26] | [2*x*] | [13] | [1.25] | [0.10] |
|  |  | **subsect. *Mutatae* (Engl. & Irmsch.) Gornall** | | | | | | | |
|  |  |  | *S. aizoides* L. | 3.05 | 26 | 2*x* | 13 | 1.52 | 0.12 |
|  |  |  |  | 3.35 | 26 | 2*x* | 13 | 1.67 | 0.13 |
|  |  |  |  | 3.71 | 26 | 2*x* | 13 | 1.86 | 0.14 |
|  |  |  |  | 3.80 | 26 | 2*x* | 13 | 1.90 | 0.15 |
|  |  |  | *S. mutata* subsp. *demissa* (Schott & Kotschy) D.A.Webb | 3.84 | [26] | [2*x*] | [13] | [1.92] | [0.15] |
|  |  | **subsect. *Squarrosae* (Engl. & Irmsch.) Tkach, Röser & M.H.Hoffm.** | | | | | | | |
|  |  |  | *S. caesia* L. | 3.56 | 24, **26** | 2*x* | 13 | 1.78 | 0.14 |
|  |  |  |  | 3.60 | 24, **26** | 2*x* | 13 | 1.80 | 0.14 |
|  |  |  |  | 3.86 | 24, **26** | 2*x* | 13 | 1.93 | 0.15 |
|  |  |  | *S. squarrosa* Sieber | 3.28 | 26 | 2*x* | 13 | 1.64 | 0.13 |
|  |  |  |  |  |  |  |  |  |  |
| ***Chrysosplenium* L.** | | | |  |  |  |  |  |  |
|  |  |  | *C. alternifolium* L. | 1.94 | 18, 24, 36, 48, 72, 96 | ? | ? | ? | ? |
|  |  |  | *C. griffithii* Hook.f. & Thomson | 7.50 | 18, **36** | [4*x*] | [9] | [1.88] | [0.21] |
|  |  |  |  |  |  |  |  |  |  |
| ***Heuchera* L.** | | | | |  |  |  |  |  |
|  |  |  | *H. pubescens* Pursh | 1.68 | 14 | 2*x* | 7 | 0.84 | 0.06 |
|  |  |  |  |  |  |  |  |  |  |
| ***Micranthes* Haw.** | | | | | |  |  |  |  |
|  | **sect. *Stellares* (Engl. & Irmsch.) Tkach** | | | | | | | | |
|  |  |  | *M. petiolaris* (Raf.) Bush | 1.33 | N/A | [2*x*] | ? | [0.67] | ? |
|  | **sect. *Melanocentrae* (Engl. & Irmsch.) Tkach** | | | | | | | | |
|  |  |  | *M. divaricata* Losinsk. | 1.53 | [22] | [2*x*] | [11] | [0.77] | [0.07] |
|  |  |  |  | 1.57 | [22] | [2*x*] | [11] | [0.79] | [0.07] |
|  |  |  | *M. lumpuensis* (Engl.) Losinsk. | 1.66 | [22] | [2*x*] | [11] | [0.83] | [0.09] |
|  |  |  | *M. pallida* (Wall. ex Ser.) Losinsk. | 2.75 | 16, **22**, 44, 66 | [2*x*] | 11 | [1.38] | [0.13] |
|  |  |  |  | 2.75 | 16, **22**, 44, 66 | [2*x*] | 11 | [1.38] | [0.13] |
|  |  |  |  | 2.79 | 16, **22**, 44, 66 | [2*x*] | 11 | [1.40] | [0.13] |
|  |  |  |  | 9.26 | 16, 22, 44, 66, [≥**66**] | [≥6*x*] | 11 | [≤1.54] | ? |
|  | **sect. *Rotundifoliatae* (A.M.Johnson) Tkach** | | | | | | | | |
|  |  |  | *M. nelsoniana* (D.Don) Small | 1.64 | 24–84 | [2*x*] | ? | [0.82] | ? |
|  |  |  | *M. odontoloma* (Piper) A.Heller | 4.40 | 48 | [4*x*] | ? | [1.10] | ? |
|  | **sect. *Micranthes*** | | | | | | | |  |
|  |  |  | *M. micranthidifolia* (Haw.) Small | 3.07 | 22 | 2*x* | 11 | [1.53] | [0.14] |
|  |  |  | *M. pensylvanica* L. | 25.31 | 56, 58, 84, 112 | ? | ? | ? | ? |
|  |  |  | *M. sachalinensis* (F.Schmidt) S.Akyama & H.Ohba | 3.33 | 16, **40** | [4*x* ?] | ? | ? | ? |
|  |  |  |  |  |  |  |  |  |  |
| ***Ozomelis* Raf.** | | | | | | | |  |  |
|  |  |  | *O. stauropetala* (Piper) Rydb. | 0.55 | 14 | *2x* | 7 | 0.28 | 0.04 |

1 The chromosome number of 2*n* = 12 for *Saxifraga sempervivum* (Franzén and Gustavsson 1983) requires confirmation. We assume that this species, like most other members of *S.* subsect. *Kabschia*, has 2*n* = 26 (see below chapters “Sect. *Porphyrion*” and “Divergent reports…”)
