# Supplementary material for: Genome sizes and chromosomal repatterning in the evolution of Saxifraga and other Saxifragaceae
Source: Research Square preprint supplement (doi:10.21203/rs.3.rs-8115725/v1), 2025-11-25
Supplement: Supplementary file 6 [file 91bfba3e896de78ef5e69424.docx]

**Table 3** Survey of previously published genome size estimates in *Saxifraga* species and other Saxifragaceae genera, including the given 2*n* chromosome numbers, chromosome base number *x* and the ploidy levels. All estimates were made using flow cytometry (FCM). Genome size data specified in the original publications as relative values, i.e., as a sample/standard ratio of the fluorescence histograms, were converted to absolute values in pg based on the 2C values of the employed standard species (see footnote 1). These recalculated values are marked by an asterisk. The fluorescent dyes used for FCM are abbreviated as follows: DAPI 4’,6-diamidino-2-phenylindole, EB ethidium bromide and PI propidium iodide. *N/A* not available, *Ref*. Reference

| **Taxon** | | | | **2C as specified in the original publication or recalculated [pg]** | **Fluorescent dye used for FCM** | **2*n* as specified** | ***x* as specified** | **Ploidy level as specified** | **Ref.2** |
| --- | --- | --- | --- | --- | --- | --- | --- | --- | --- |
| ***Saxifraga* L.** | | | | | |  |  |  |  |
|  | **sect. *Ciliatae* Haw.** | | | | |  |  |  |  |
|  |  | **Clade 1** | | |  |  |  |  |  |
|  |  |  | *S. filicaulis* Wall. ex Ser. | 2.03* | DAPI | N/A | N/A | 2*x* | a |
|  |  |  |  | 3.90* | DAPI | N/A | N/A | 4*x* | a |
|  |  |  |  | 4.10* | DAPI | N/A | N/A | 4*x* | a |
|  |  |  | *S. flagellaris* Willd. | 5.65* | DAPI | 32 | 8 | 4*x* | a |
|  |  |  | *S. macrostigmatoides* Engl. | 3.20* | DAPI | N/A | N/A | 3*x* | a |
|  |  |  |  | 4.38* | DAPI | N/A | N/A | 4*x* | a |
|  |  |  | *S. oreophila* Franch. | 3.08* | DAPI | N/A | N/A | 2*x*–3*x* | a |
|  |  |  | *S. wallichiana* Sternb. | 5.50* | DAPI | N/A | N/A | 4*x* | a |
|  |  | **Clade 2** | | | | | | |  |
|  |  |  | *S. aurantiaca* Franch. | 2.78* | DAPI | N/A | N/A | 2*x* | a |
|  |  |  |  | 2.85* | DAPI | N/A | N/A | 2*x* | a |
|  |  |  |  | 2.88* | DAPI | N/A | N/A | 2*x* | a |
|  |  |  |  | 2.88* | DAPI | N/A | N/A | 2*x* | a |
|  |  |  |  | 3.05* | DAPI | N/A | N/A | 2*x* | a |
|  |  |  |  | 4.85* | DAPI | N/A | N/A | 3*x* | a |
|  |  |  | *S. consanguinea* W.W.Sm. | 2.70* | DAPI | N/A | N/A | 2*x* | a |
|  |  |  | *S. gemmigera* Engl. ex Diels | 5.43* | DAPI | N/A | N/A | 4*x* | a |
|  |  |  | *S. glacialis* Harry Sm. | 2.93* | DAPI | N/A | N/A | 2*x* | a |
|  |  |  |  | 3.12* | DAPI | N/A | N/A | 2*x* | a |
|  |  |  |  | 3.15* | DAPI | N/A | N/A | 2*x* | a |
|  |  |  | *S. heterotricha* C.Marquand & Airy Shaw | 3.38* | DAPI | N/A | N/A | 2*x*–3*x* | a |
|  |  |  | *S. ilonakhensis* W.W. Smith | 2.83* | DAPI | N/A | N/A | 2*x* | a |
|  |  | **subsect. *Hirculoideae* (Clade 3)** | | | | | | |  |
|  |  |  | *S. cardiophylla* Franch. | 6.28* | DAPI | N/A | N/A | 4*x* | a |
|  |  |  |  | 6.55* | DAPI | N/A | N/A | 4*x* | a |
|  |  |  | *S. diversifolia* Wall. ex Ser. | 6.00* | DAPI | N/A | N/A | 4*x* | a |
|  |  |  |  | 6.13* | DAPI | N/A | N/A | 4*x* | a |
|  |  |  |  | 6.33* | DAPI | N/A | N/A | 4*x* | a |
|  |  |  |  | 6.55* | DAPI | N/A | N/A | 4*x* | a |
|  |  |  |  | 1.88 | N/A | N/A | N/A | N/A | b |
|  |  |  | *S. giraldiana* Engl. | 5.95* | DAPI | N/A | N/A | 4*x* | a |
|  |  |  | *S. implicans* Harry Sm. | 5.88* | DAPI | N/A | N/A | 4*x* | a |
|  |  |  | *S. nigroglandulifera* N.P.Balakr. | 5.83* | DAPI | N/A | N/A | 4*x* | a |
|  |  |  | *S. omphalodifolia* Hand.-Mazz. | 6.58* | DAPI | N/A | N/A | 4*x* | a |
|  |  |  | *S. peplidifolia* Franch. | 5.10* | DAPI | N/A | N/A | 4*x* | a |
|  |  |  | *S. sinomontana* J.T.Pan & Gornall | 4.40* | DAPI | N/A | N/A | 4*x* | a |
|  | **sect. *Mesogyne* Sternb.** | | | | | | | |  |
|  |  |  | *S. bracteata* D.Don | 1.13* | DAPI | 26 | 13 | 2*x* | c |
|  |  |  | *S. flexuosa* Sternb. | 0.94* | DAPI | 26 | 13 | 2*x* | c |
|  |  |  | *S. hyperborea* R.Br. | 0.94* | DAPI | 26 | 13 | 2*x* | c |
|  |  |  | *S. rivularis* L. | 2.04* | DAPI | 52 | 13 | 4*x* | c |
|  | **sect. *Saxifraga*** | | | | | | | |  |
|  |  | **subsect. *Tridactylites* (Haw.) Gornall** | | | | | | | |
|  |  |  | *S. blaui* (Engl.) Beck | 1.30 | PI | N/A | N/A | N/A | d |
|  |  |  | *S. tridactylites* L. | 1.15 | PI | 22 | N/A | 2*x* | e |
|  |  |  |  | 1.34 | PI | 22 | 11 | 2*x* | f |
|  |  |  |  | 1.26 | PI | 22 | 11 | 2*x* | d |
|  |  | **subsect. *Arachnoideae* (Engl. & Irmsch.) Tkach, Röser & M.H.Hoffm.** | | | | | | | |
|  |  |  | *S. prenja* Beck | 3.35 | PI | N/A | N/A | N/A | g |
|  |  | **subsect. *Saxifraga*** | | | | | | | |
|  |  |  | *S. aquatica* Lapeyr. | 1.96 | PI | 28 | N/A | N/A | h |
|  |  |  | *S.* ×*bubaniana* Engl. & Irmsch. = *S. geranioides* L. × *S. pubescens* Pourr. subsp. *pubescens* | 1.56 | PI | N/A | N/A | 2*x* | i |
|  |  |  | *S. bulbifera* L. | 1.51 | PI | 28 | 14 | 2*x* | e |
|  |  |  | *S.* ×*cadevallii* Luizet & Soulié = *S. geranioides* L. × *S. pubescens* subsp. *pubescens* | 1.53 | PI | N/A | N/A | 2*x* | i |
|  |  |  | *S. conifera* Coss. & Durieu | 1.31 | PI | 42 | 14 | 6*x* | j |
|  |  |  | *S. fragilis* Schrank | 1.74 | PI | 64 | N/A | 2*x* | i |
|  |  |  | *S. genesiana* P.Vargas | 1.75 | PI | ca. 44 | N/A | 2*x* | i |
|  |  |  | *S. geranioides* L. | 1.55* | DAPI | N/A | N/A | 2*x* | k |
|  |  |  |  | 1.70 | PI | ca. 44, ca. 52 | N/A | 2*x* | i |
|  |  |  | *S. granulata* L. | 4.76 | EB | 52 | N/A | 4*x* | l |
|  |  |  |  | 4.65 | PI | 52 | N/A | 6*x* | e |
|  |  |  |  | 2.28 | EB | 30 | 11 | N/A | l |
|  |  |  |  | 4.97 | PI | N/A | N/A | N/A | f |
|  |  |  |  | 4.66 | PI | 52 | N/A | 4*x* | m |
|  |  |  | *S. granulata* subsp. *granulata* | 1.35 | EB | N/A | 11 | 2*x* | l |
|  |  |  | *S. granulata* subsp. *fernandesii* Redondo & Horjales | 3.54 | EB | N/A | 11 | 4*x* | l |
|  |  |  | *S. hariotii* Luizet & Soulié | 1.30* | DAPI | N/A | N/A | 2*x* | k |
|  |  |  | *S. intricata* Lapeyr. | 1.32* | DAPI | N/A | N/A | 2*x* | k |
|  |  |  |  | 1.43 | PI | 32, 34 | N/A | 2*x* | i |
|  |  |  | *S. iratiana* F.W.Schultz | 1.25* | DAPI | N/A | N/A | 2*x* | k |
|  |  |  | *S.* ×*jeanpertii* Luizet = *S. moschata* Wulfen × *S. pubescens* subsp. *pubescens* | 1.38 | PI | N/A | N/A | 2*x* | i |
|  |  |  | *S. maderensis* D.Don | 7.52 | PI | ca. 100–124 | N/A | 8*x* | i |
|  |  |  | *S. moschata* Wulfen | 1.15* | DAPI | N/A | N/A | 2*x* | k |
|  |  |  |  | 2.39* | DAPI | N/A | N/A | 4*x* | k |
|  |  |  |  | 1.24 | PI | 22 | N/A | 2*x* | e |
|  |  |  |  | 1.31 | PI | N/A | N/A | 2*x* | i |
|  |  |  |  | 2.59 | PI | ca. 56 | N/A | 4*x* | i |
|  |  |  | *S. pentadactylis* Lapeyr. | 1.35* | DAPI | N/A | N/A | 2*x* | k |
|  |  |  | *S. pentadactylis* subsp. *pentadactylis* | 1.49 | PI | 32 | N/A | 2*x* | i |
|  |  |  | *S. portosanctana* Boiss. | 2.92 | PI | ca. 54, ca. 60 | N/A | 4*x* | i |
|  |  |  | *S. pubescens* Pourr. subsp. *pubescens* | 1.28* | DAPI | N/A | N/A | 2*x* | k |
|  |  |  |  | 1.42 | PI | 26, 28 | N/A | 2*x* | i |
|  |  |  | *S. vayredana* Luizet | 1.36 | PI | 62, 64 | N/A | 2*x* | i |
|  | **sect. *Cotylea* Tausch** | | | | | | | | |
|  |  |  | *S. rotundifolia* L. | 3.28 | PI | N/A | N/A | N/A | n |
|  | **sect. *Gymnopera* D.Don** | | | | | | | | |
|  |  |  | *S. hirsuta* subsp. *paucicrenata* (Leresche ex Gillot) D.A.Webb | 3.21 | PI | 28 | 14 | 2*x* | j |
|  | **sect. *Ligulatae* Haw.** | | | | | | | | |
|  |  |  | *S. paniculata* Mill. | 3.20 | PI | 28 | 14 | 2*x* | j |
|  |  |  |  | 2.97 | PI | 28 | N/A | 2*x* | e |
|  |  |  |  | 2.88 | PI | 28 | N/A | 2*x* | e |
|  |  |  |  | 2.81 | PI | 28 | N/A | 2*x* | e |
|  | **sect. *Porphyrion* Tausch** | | | | | | | | |
|  |  | **subsect. *Squarrosae* (Engl. & Irmsch.) Tkach, Röser & M.H.Hoffm.** | | | | | | | |
|  |  |  | *S. caesia* L. | 1.72 | PI | 22, 24 | N/A | N/A | d |
|  |  | **subsect. *Kabschia* (Engl.) Rouy & Camus** | | | | | | | |
|  |  |  | *S. marginata* Sternb. | 3.34 | PI | 48 3 | N/A | N/A | d |
|  |  |  |  |  |  |  |  |  |  |
|  |  | **subsect. *Oppositifoliae* Hayek** | | | | | | | |
|  |  |  | *S. oppositifolia* L. subsp. *oppositifolia* | 2.93 | PI | N/A | 14 | N/A | j |
|  |  |  |  | 2.52 | PI | 52 | 13 | 4*x* | e |
|  |  | **subsect. *Mutatae* (Engl. & Irmsch.) Gornall** | | | | | | | |
|  |  |  | *S. aizoides* L. | 1.36 | PI | 26 | N/A | N/A | h |
|  |  |  |  |  |  |  |  |  |  |
| ***Chrysosplenium* L.** | | | | |  |  |  |  |  |
|  |  |  | *C. alternifolium* L. | 1.65 | PI | 48 | N/A | 4*x* | e |
|  |  |  | *C. oppositifolium* L. | 0.93 | PI | 42 | N/A | 4*x* | e |
|  |  |  |  |  |  |  |  |  |  |
| ***Heuchera* L.** | | | |  |  |  |  |  |  |
|  |  |  | *H. sanguinea* Engelm. | 1.19 | PI | N/A | N/A | 2*x* | f |
|  |  |  |  |  |  |  |  |  |  |
| ***Micranthes* Haw.** | | | | |  |  |  |  |  |
|  | **sect. *Stellares* (Engl. & Irmsch.) Tkach** | | | | | | | | |
|  |  |  | *M. stellaris* subsp. *robusta* (Engl.) Gornall | 0.73 | PI | N/A | N/A | N/A | h |
|  | **sect. *Rotundifoliatae* (A.M.Johnson) Tkach** | | | | | | | | |
|  |  |  | *M. nivalis* (L.) Small (as *S. nivalis* L.) | 4.24 | PI | 60 | N/A | 6*x* | e |
|  | **sect. *Micranthes*** | | | | | | | |  |
|  |  |  | *M. pensylvanica* L. | 5.00 | PI | N/A | N/A | N/A | o |
|  |  |  |  |  |  |  |  |  |  |
| ***Mitella* Tourn. ex L.** | | | | | | | | | |
|  |  |  | *M. diphylla* L. | 1.10 | PI | N/A | N/A | N/A | o |

1 *Agave* *americana* L. ‘Aureomarginata’ (15.9 pg/2C); *Bellis* *perennis* L. (3.38 pg/2C); *Carex* *acutiformis* Ehrh. (0.82 pg/2C); *Glycine* *max* Merr. ‘Polanka’ (2.50 pg/2C); *Lactuca* *sativa* L. (5.5 pg/2C); *Oryza* *sativa* subsp. *japonica* Shig.Kato ‘Nipponbare’ (0.80 pg/2C); *Petunia* ×*hybrida* Hort. ex Vilm.-Andr. ‘PxPc6’ (2.85 pg/2C); *Pisum* *sativum* L. ‘Ctirad’ (9.09 pg/2C), *P.* *sativum* ‘Express long’ (8.37 pg/2C), and *Solanum* *lycopersicum* L. ‘Stupické polní rané’ (1.96 pg/2C) (Marie and Brown 1993; Doležel et al. 2007, 2018; Schönswetter et al. 2007; Šmarda et al. 2019; Temsch et al. 2022)

2 References: **a** Ebersbach et al. (2018); **b** Guo et al. (2015); **c** Jørgensen et al. (2006); **d** Pustahija et al. (2025); **e** Šmarda et al. (2019); **f** Zonneveld (2019); **g** Siljak-Yakovlev et al. (2020); **h** Hidalgo et al. (2015); **i** Mas de Xaxars et al. (2015); **j** Loureiro et al. (2013); **k** Carnicero et al. (2023); **l** Redondo et al. (1996); **m** Šmarda et al. (2013); **n** Vallès et al. (2014); **o** Bai et al. (2012)

3 This chromosome number given in CCDB (2025) refers to *S. carpatica* Rchb., which belongs to sect. *Mesogyne*, and not to *S. carpathica* N.Terracc., which would indeed be a synonym of *S. marginata* Sternb. The correct chromosome number for *S. marginata* Sternb. is 2*n* = 26 (Skovsted 1934). See also Table 2 above
