# Supplementary material for: Genome sizes and chromosomal repatterning in the evolution of Saxifraga and other Saxifragaceae
Source: Research Square preprint supplement (doi:10.21203/rs.3.rs-8115725/v1), 2025-11-25
Supplement: Supplementary file 7 [file dce395113bf1179674c57a1d.docx]

**Table 5** Chromosome numbers of the species of *Saxifraga* sect. *Saxifraga* subsect. *Arachnoideae*

| **Species** | **Chromosome number 2*n* =** | **Reference** |
| --- | --- | --- |
| *S. aphylla* Sternb. | 58–66 | Damboldt (1965) |
|  | 58–62, 62 | Favarger (1965) |
|  | 60 | Küpfer and Rais (1983) |
| *S. arachnoidea* Sternb. | 56 | Damboldt and Podlech (1963), but Damboldt (1965) declared this count to be wrong |
|  | 66 | Damboldt (1965) |
| *S. berica* (Bég.) D.A.Webb | not known |  |
| *S. facchinii* W.D.J.Koch | not known |  |
| *S. hohenwartii* Vest ex Sternb. | ca. 60 | Favarger (1965) |
|  | 52–56 | Hörandl (1993); Dobeš et al. (1997) |
| *S. muscoides* All. | 36–38, 38 | Favarger (1983) |
|  | 38 | Küpfer and Rais (1965) |
| *S. paradoxa* Sternb. | 64 | Teppner (1982) |
| *S. petraea* L. | 64 | Skovsted (1934); Damboldt (1965) |
| *S. prenja* Beck | not known |  |
| *S. presolanensis* Engl. | 16 | Damboldt and Podlech (1963) |
| *S. sedoides* L. | 62–65, 64 | Favarger (1965) |
|  | 52 | Hörandl (1993); Dobeš et al. (1997) |
| *S. tenella* Wulfen | 66 | Skovsted (1934) |
|  | 64 | Dobeš et al. (1997) |
